# Supplementary material
Source: PubMed Central journal article supplement (PMC7240841)
Supplement: M20-1632_AppendixTables.pdf [file M20-1632_AppendixTables.pdf]

---

**Appendix Table 1. Search Strategies**

---

| <b>Database</b>   | <b>Search Strategy</b>                                                                                                                                                                                                                                                                                                                                                                                                                                                                                                                                                                                                                                                                                                                                                  |
|-------------------|-------------------------------------------------------------------------------------------------------------------------------------------------------------------------------------------------------------------------------------------------------------------------------------------------------------------------------------------------------------------------------------------------------------------------------------------------------------------------------------------------------------------------------------------------------------------------------------------------------------------------------------------------------------------------------------------------------------------------------------------------------------------------|
| MEDLINE (PubMed)  | ((((((((COVID 19 OR "sars cov" OR "nCOV" OR "coronavirus 2") OR ("novel coronavirus" AND (2019 : 2020[pdat]))) OR ("Severe Acute Respiratory Syndrome"[Mesh]) OR ("SARS")) OR ("Middle East Respiratory Syndrome Coronavirus"[Mesh]) OR (MERS)) OR ("severe acute respiratory syndrome coronavirus 2"[Supplementary Concept])) OR ("COVID-19"[Supplementary Concept])) AND (((("Health Personnel"[Mesh]) OR (clinician OR clinicians OR doctor OR doctors OR physician OR physician OR nurse OR nurses OR midwife OR midwives OR ambulance OR "first responder" OR "first responders" OR "EMT" OR "EMTs")) OR ((health OR healthcare OR "health care" OR clinic* OR medical OR laboratory) AND (work OR worker* OR personnel OR practitioner* OR staff OR employee*)))) |
| Embase (Elsevier) | ('covid 19' OR (covid AND 19) OR 'sars cov' OR ncov OR 'coronavirus 2' OR 'novel coronavirus' OR 'middle east respiratory syndrome coronavirus' OR 'mers' OR 'severe acute respiratory syndrome' OR 'sars') AND ('health care personnel' OR 'health workforce' OR clinician OR clinicians OR doctor OR doctors OR physician OR physician OR nurse OR nurses OR midwife OR midwives OR ambulance OR 'first responder' OR 'first responders' OR 'EMT' OR 'EMTs') AND [embase]/lim NOT ([embase]/lim AND [medline]/lim)                                                                                                                                                                                                                                                    |

---

**Appendix Table 2. Inclusion Criteria**

| Study Aspect           | Inclusion                                                                                                                                                                                                                                                                                                                                                                                                                                                                                                                                                                                                                                                                                                                                                                                                                                                                                                                                                                                                                                | Exclusion                                                                                                                                     |
|------------------------|------------------------------------------------------------------------------------------------------------------------------------------------------------------------------------------------------------------------------------------------------------------------------------------------------------------------------------------------------------------------------------------------------------------------------------------------------------------------------------------------------------------------------------------------------------------------------------------------------------------------------------------------------------------------------------------------------------------------------------------------------------------------------------------------------------------------------------------------------------------------------------------------------------------------------------------------------------------------------------------------------------------------------------------|-----------------------------------------------------------------------------------------------------------------------------------------------|
| Population             | KQ 1: HCW at risk for or with SARS-CoV-2, SARS-CoV-1, or MERS-CoV infection<br>KQ 2: HCW at risk for SARS-CoV-2, SARS-CoV-1, or MERS-CoV infection<br>KQ 3: Household contacts of HCW infected with SARS-CoV-2, SARS-CoV-1, or MERS-CoV                                                                                                                                                                                                                                                                                                                                                                                                                                                                                                                                                                                                                                                                                                                                                                                                  | KQ 1, 2: Non-HCW<br>KQ 3: Nonhousehold HCW contacts                                                                                           |
| Exposures/risk factors | KQ 1: SARS-CoV-2, SARS-CoV-1, or MERS-CoV infection<br>KQ 2:<br>Demographic characteristics: age, sex<br>Exposure history: in workplace, home, or community<br>Professional role/position<br>Administrative factors: policies; point of care assessment; patient flow/triage; use, training, adherence, availability of personal protective equipment; hours worked, shifts; contact hours<br>Health care setting and environment: unit worked (high-risk department e.g. ICU; lower risk, e.g. triage; etc.); institutional characteristics; use of negative pressure rooms; availability of hand hygiene stations<br>HCW health (e.g., premorbid conditions/comorbidities)<br>Infection prevention and control factors: policies, use (including reuse), training, adherence, availability, and type of personal protective equipment or hand washing<br>KQ 3: Demographic characteristics, presence of symptoms, use of and type of PPE, living circumstances (e.g. crowded housing, lack of separate rooms), self-quarantine methods | Other exposures/risk factors                                                                                                                  |
| Outcomes               | KQ 1:<br>SARS-CoV-2 infection: Incidence, morbidity and mortality, social and economic effects of infection; and effects on family in exposed HCWs and infected HCWs<br>SARS-CoV-1 and MERS-CoV infection: Infection and mortality in exposed and infected HCWs<br>KQ 2: Risk estimates (relative risk, odds ratio, or hazard ratio) for incidence or prevalence for risk factors; or incidence or prevalence reported by risk factor<br>KQ 3: Risk estimates and incidence of infections in household contacts of infected HCWs                                                                                                                                                                                                                                                                                                                                                                                                                                                                                                         | Other outcomes                                                                                                                                |
| Study design           | Randomized, nonrandomized, and controlled clinical trials<br>Cohort studies<br>Case-control studies<br>Cross-sectional studies<br>Case series (KQ 1)                                                                                                                                                                                                                                                                                                                                                                                                                                                                                                                                                                                                                                                                                                                                                                                                                                                                                     | Systematic reviews (reference lists of relevant reviews checked for primary studies)<br>Case reports<br>Anecdotal reports<br>Modeling studies |
| Language               | No restrictions                                                                                                                                                                                                                                                                                                                                                                                                                                                                                                                                                                                                                                                                                                                                                                                                                                                                                                                                                                                                                          |                                                                                                                                               |

CoV = coronavirus; HCW = health care worker; ICU = intensive care unit; KQ = key question; MERS = Middle East respiratory syndrome; SARS = severe acute respiratory syndrome.

**Appendix Table 3. Burden of SARS-CoV-2, SARS-CoV-1, and MERS-CoV\***

| Study, Year (Reference)                | Study Design         | Setting and Study Dates                                                                                  | Population Characteristics                                                                                                                                                                                                                                                      | Outcomes                                                                                                                                                                                                                                                                                                                                                                                                                                                                                                                                                                                                                                                                                                                                                                                                                                                                                                                                                                                                                                                                                                                                                                                                                                                                                                                                                                                                                                                                                                                                                                                                                                                                                                                                                                                                                                                                                                                 | Limitations                                                                                                                  |
|----------------------------------------|----------------------|----------------------------------------------------------------------------------------------------------|---------------------------------------------------------------------------------------------------------------------------------------------------------------------------------------------------------------------------------------------------------------------------------|--------------------------------------------------------------------------------------------------------------------------------------------------------------------------------------------------------------------------------------------------------------------------------------------------------------------------------------------------------------------------------------------------------------------------------------------------------------------------------------------------------------------------------------------------------------------------------------------------------------------------------------------------------------------------------------------------------------------------------------------------------------------------------------------------------------------------------------------------------------------------------------------------------------------------------------------------------------------------------------------------------------------------------------------------------------------------------------------------------------------------------------------------------------------------------------------------------------------------------------------------------------------------------------------------------------------------------------------------------------------------------------------------------------------------------------------------------------------------------------------------------------------------------------------------------------------------------------------------------------------------------------------------------------------------------------------------------------------------------------------------------------------------------------------------------------------------------------------------------------------------------------------------------------------------|------------------------------------------------------------------------------------------------------------------------------|
| <b>SARS-CoV-2</b>                      |                      |                                                                                                          |                                                                                                                                                                                                                                                                                 |                                                                                                                                                                                                                                                                                                                                                                                                                                                                                                                                                                                                                                                                                                                                                                                                                                                                                                                                                                                                                                                                                                                                                                                                                                                                                                                                                                                                                                                                                                                                                                                                                                                                                                                                                                                                                                                                                                                          |                                                                                                                              |
| Ran et al, 2020 (61)                   | Retrospective cohort | China (Wuhan); 1 hospital serving outbreak; follow-up through 28 January 2020                            | 72 HCWs with acute symptoms <ul style="list-style-type: none"> <li>• Median age, 31 y</li> <li>• 69% female</li> <li>• 53% clinicians and 47% nurses</li> </ul>                                                                                                                 | Incidence of COVID-19: 38.9% (28/72)                                                                                                                                                                                                                                                                                                                                                                                                                                                                                                                                                                                                                                                                                                                                                                                                                                                                                                                                                                                                                                                                                                                                                                                                                                                                                                                                                                                                                                                                                                                                                                                                                                                                                                                                                                                                                                                                                     | No information on clinical outcomes of COVID-19; selection of HCWs for testing unclear                                       |
| Dai et al, 2020(28)                    | Cross-sectional      | China (Hubei province); HCWs from throughout province; 3-11 February 2020                                | 4357 HCWs <ul style="list-style-type: none"> <li>• Mean age, 35 y</li> <li>• 76.5% female</li> <li>• 32.6% physicians, 53.8% nurses, 10.0% technicians, 3.6% support staff</li> <li>• 0.9% diagnosed with COVID-19</li> </ul>                                                   | GHQ-12 score $\geq 3$ : 39.1% (1704/4357)<br>Adjusted OR (95% CI) for GHQ-12 score $\geq 3$ <ul style="list-style-type: none"> <li>• Female vs. male: <b>1.53 (1.26-1.85)</b></li> <li>• Nurse vs. doctor: 0.97 (0.81-1.15)</li> <li>• Technician vs. doctor: <b>0.73 (0.57-0.94)</b></li> <li>• Support staff vs. doctor: 0.80 (0.55-1.18)</li> <li>• Hospital type (reference ministerial/provincial) <ul style="list-style-type: none"> <li>◦ Municipal: <b>1.45 (1.17-1.81)</b></li> <li>◦ Country: <b>1.71 (1.30-2.23)</b></li> <li>◦ Township/community: <b>1.46 (1.08-1.98)</b></li> </ul> </li> </ul>                                                                                                                                                                                                                                                                                                                                                                                                                                                                                                                                                                                                                                                                                                                                                                                                                                                                                                                                                                                                                                                                                                                                                                                                                                                                                                            | <b>Not peer reviewed</b><br>No control for baseline symptoms; no non-HCW controls; no control for work exposures             |
| Kang, 2020 (36)                        | Cross-sectional      | China (Wuhan); HCWs from hospitals in Wuhan; 29 January to 4 February 2020                               | 994 HCWs <ul style="list-style-type: none"> <li>• 63.4% aged 25-40 y</li> <li>• 85% female</li> <li>• 31.1% high-risk department</li> <li>• 18.4% physicians; 81.6% nurses</li> <li>• 1.9% (19/994) positive for SARS-CoV-2 infection</li> </ul>                                | Proportion classified into moderate or severe mental health disturbance clusters: <ul style="list-style-type: none"> <li>• Moderate: 22.4% (223/994) <ul style="list-style-type: none"> <li>◦ Mean depression (PHQ-9) score: 9.0 (SD, 3.9)</li> <li>◦ Mean anxiety (GAD-7) score: 8.2 (SD, 3.6)</li> <li>◦ Mean insomnia (ISI) score: 10.4 (SD, 4.8)</li> <li>◦ Mean distress (IES-R) score: 39.9 (SD, 5.4)</li> </ul> </li> <li>• Severe: 6.2% (62/994) <ul style="list-style-type: none"> <li>◦ Mean depression (PHQ-9) score: 15.1 (SD, 5.2)</li> <li>◦ Mean anxiety (GAD-7) score: 15.1 (SD, 4.3)</li> <li>◦ Mean insomnia (ISI) score: 15.6 (SD, 5.2)</li> <li>◦ Mean distress (IES-R) score: 60.0 (SD, 9.8)</li> </ul> </li> </ul> <p>No association between increased risk for moderate or severe mental health disturbance and age, sex, type of HCW or department</p>                                                                                                                                                                                                                                                                                                                                                                                                                                                                                                                                                                                                                                                                                                                                                                                                                                                                                                                                                                                                                                           | Participation rate not reported; no control for baseline symptoms; no non-HCW controls                                       |
| Kluytmans-van den Berg et al, 2020(39) | Cross-sectional      | The Netherlands; 2 hospitals; 7-12 March 2020                                                            | 1853 HCWs with fever or mild respiratory symptoms in past 10 d <ul style="list-style-type: none"> <li>• Median age, 49 y (cases)</li> <li>• 83% female (cases)</li> <li>• HCW role/position not reported</li> <li>• 6.4% (86/1353) positive for SARS-CoV-2 infection</li> </ul> | Prevalence of SARS-CoV-2 infection (PCR): 6.4% (86/1353)<br>Met case definition (fever and/or coughing and/or shortness of breath): 91.9% (79/86)<br>Recovery (by day of interview): 23.3% (20/86), median duration of illness 8 days<br>Admitted to hospital (not critical): 3.7% (2/86)                                                                                                                                                                                                                                                                                                                                                                                                                                                                                                                                                                                                                                                                                                                                                                                                                                                                                                                                                                                                                                                                                                                                                                                                                                                                                                                                                                                                                                                                                                                                                                                                                                | <b>Not peer reviewed</b><br>77% not recovered at time of interview                                                           |
| Lai et al, 2020 (40)                   | Cross-sectional      | China; HCWs from hospitals with COVID-19 fever clinics or wards for COVID-19; 29 January-3 February 2020 | 1257 HCWs <ul style="list-style-type: none"> <li>• 65% aged 26-40 y</li> <li>• 77% female</li> <li>• 39% physicians and 61% nurses</li> <li>• Proportion diagnosed with COVID-19 not reported</li> </ul>                                                                        | Depression symptoms (PHQ-9), moderate or severe: 14.7% (186/1257)<br>Anxiety symptoms (GAD-7), moderate or severe: 12.3% (154/1257)<br>Insomnia symptoms (ISI), moderate or severe: 7.7% (97/1257)<br>Distress symptoms (IES-R), moderate or severe: 35.0% (440/1257)<br>Adjusted OR (95% CI): <ul style="list-style-type: none"> <li>• Depression symptoms (PHQ-9) <ul style="list-style-type: none"> <li>◦ Women vs. men: <b>1.94 (1.26-2.98)</b></li> <li>◦ Secondary vs. tertiary hospital: <b>1.65 (1.17-2.34)</b></li> <li>◦ Technical title: <ul style="list-style-type: none"> <li>▪ Intermediate vs. junior: <b>1.77 (1.25-2.49)</b></li> <li>▪ Senior vs. junior: 1.21 (0.72-2.03)</li> </ul> </li> <li>◦ Frontline vs. second-line HCW: <b>1.52 (1.11-2.09)</b></li> </ul> </li> <li>• Anxiety symptoms (GAD-7) <ul style="list-style-type: none"> <li>◦ Women vs. men: <b>1.69 (1.23-2.33)</b></li> <li>◦ Secondary vs. tertiary hospital: <b>1.43 (1.08-1.90)</b></li> <li>◦ Technical title: <ul style="list-style-type: none"> <li>▪ Intermediate vs. junior: <b>1.82 (1.38-2.39)</b></li> <li>▪ Senior vs. junior: 1.01 (0.67-1.51)</li> </ul> </li> <li>◦ Frontline vs. second-line HCW: <b>1.57 (1.22-2.02)</b></li> </ul> </li> <li>• Insomnia symptoms (ISI) <ul style="list-style-type: none"> <li>◦ Frontline vs. second-line: <b>2.97 (1.92-4.60)</b></li> </ul> </li> <li>• Distress symptoms (IES-R) <ul style="list-style-type: none"> <li>◦ Women vs. men: <b>1.45 (1.08-1.96)</b></li> <li>◦ Technical title: <ul style="list-style-type: none"> <li>▪ Intermediate vs. junior: <b>1.94 (1.48-2.55)</b></li> <li>▪ Senior vs. junior: 1.03 (0.69-1.55)</li> </ul> </li> <li>◦ Frontline vs. second-line HCW: <b>1.60 (1.25-2.04)</b></li> <li>◦ Location: Hubei outside Wuhan vs. Wuhan: 0.77 (0.57-1.06)</li> <li>◦ Outside Hubei vs. Wuhan: <b>0.62 (0.43-0.88)</b></li> </ul> </li> </ul> | Response rate 69%; no control for baseline symptoms; no non-HCW controls; no control for work exposures                      |
| Liu et al, 2020 (46)                   | Cross-sectional      | China; HCWs from multiple urban and rural hospitals; 10-20 February 2020                                 | 512 HCWs <ul style="list-style-type: none"> <li>• 75.4% aged 18-39 y</li> <li>• 85% female</li> <li>• 32.0% direct treatment contact of COVID-19-infected patient</li> <li>• 8.0% suspected COVID-19 case</li> </ul>                                                            | Anxiety score (scale 20-80; higher score = more anxiety), direct treatment contact vs. nondirect treatment contact: <b>38.8 (SD, 8.4) vs. 41.1 (SD, 9.8); P = 0.007</b><br>Adjusted beta (95% CI) for anxiety score: <ul style="list-style-type: none"> <li>• Direct contact vs. nondirect contact: 2.33 (0.65-4.00)</li> <li>• Contact with suspect cases vs. no suspect cases: <b>4.44 (1.55-7.33)</b></li> <li>• Hubei province vs. other: <b>3.67 (1.44-5.89)</b></li> </ul>                                                                                                                                                                                                                                                                                                                                                                                                                                                                                                                                                                                                                                                                                                                                                                                                                                                                                                                                                                                                                                                                                                                                                                                                                                                                                                                                                                                                                                         | <b>Not peer reviewed</b><br>85% response rate; sample limited to HCWs utilizing WeChat app; no control for baseline symptoms |
| Lu et al, 2020 (51)                    | Cross-sectional      | China (Fujian Province); single provincial hospital; 25-26 February                                      | 2299 (2042 direct contact workers and 257 administrative staff)                                                                                                                                                                                                                 | Medical staff vs. administrative staff                                                                                                                                                                                                                                                                                                                                                                                                                                                                                                                                                                                                                                                                                                                                                                                                                                                                                                                                                                                                                                                                                                                                                                                                                                                                                                                                                                                                                                                                                                                                                                                                                                                                                                                                                                                                                                                                                   | Response rate not reported; no non-HCW control; no control for                                                               |

|                                                                             |                                 |                                                                                                         |                                                                                                                                                                                                                                                                                                   |                                                                                                                                                                                                                                                                                                                                                                                                                                                                                                                                                                                                                                                                                                                                                                                                                                                                                                                                                                                                                                                                                                                                                                                                                                                                        |                                                                                                                                                         |
|-----------------------------------------------------------------------------|---------------------------------|---------------------------------------------------------------------------------------------------------|---------------------------------------------------------------------------------------------------------------------------------------------------------------------------------------------------------------------------------------------------------------------------------------------------|------------------------------------------------------------------------------------------------------------------------------------------------------------------------------------------------------------------------------------------------------------------------------------------------------------------------------------------------------------------------------------------------------------------------------------------------------------------------------------------------------------------------------------------------------------------------------------------------------------------------------------------------------------------------------------------------------------------------------------------------------------------------------------------------------------------------------------------------------------------------------------------------------------------------------------------------------------------------------------------------------------------------------------------------------------------------------------------------------------------------------------------------------------------------------------------------------------------------------------------------------------------------|---------------------------------------------------------------------------------------------------------------------------------------------------------|
|                                                                             | 2020                            |                                                                                                         | <ul style="list-style-type: none"> <li>78% aged &lt;30-40 y</li> <li>78% female</li> <li>22% high-risk department (respiratory, emergency, ICU or infectious disease)</li> <li>Proportion diagnosed with COVID-19 not reported</li> </ul>                                                         | <ul style="list-style-type: none"> <li>Anxiety symptoms (HAM-A), mild/moderate: 22.6% (462/2042) vs. 17.1% (44/257)</li> <li>Anxiety symptoms (HAM-A), severe/extreme: 2.9% (59/2042) vs. 1.6% (4/257)</li> <li>Depression symptoms (HAM-D), mild/moderate: 11.8% (241/2042) vs. 8.2% (21/257)</li> <li>Depression symptoms (HAM-D), severe/extreme: 0.3% (6/2042) vs. 0% (0/257)</li> <li>Fear scale (0 to 10 NRS), moderate: 43.9% (896/2042) vs. 38.9% (100/257)</li> <li>Fear symptoms (0 to 10 NRS), severe/extreme: 26.7% (545/2042) vs. 19.5% (50/257)</li> </ul> <p>Adjusted hazard ratio (95% CI), direct contact worker vs. nonclinical:<br/> Fear, high-risk worker: <b>1.41 (1.02-1.93)</b>; low-risk worker: 1.30 (0.99-1.72)<br/> Anxiety (HAMA), high-risk worker: <b>2.06 (1.35-3.15)</b>; low-risk: 1.31 (0.89-2.93)<br/> Depression (HAM-D), high-risk worker: <b>2.02 (1.10-3.69)</b>; low-risk: 1.39 (0.80-2.43)</p>                                                                                                                                                                                                                                                                                                                               | baseline symptoms                                                                                                                                       |
| Qi et al, 2020 (59)                                                         | Cross-sectional                 | China (Hubei Province); HCWs from hospitals throughout province; dates not reported                     | 1306 HCWs (persons with sleep disturbances and treated for psychiatric conditions excluded) <ul style="list-style-type: none"> <li>Mean age, 33.1 y</li> <li>80% female</li> <li>61% frontline HCW and 39% nonfrontline</li> <li>Proportion diagnosed with COVID-19 not reported</li> </ul>       | Pittsburgh Sleep Quality Index >7: 59.6% (779/1306) overall<br>67.2% (538/801) frontline medical workers vs. 47.7% (241/505) nonfrontline medical workers, $P < 0.0001$<br>Athens Insomnia Index >6: 45.5% (594/1306) overall<br><ul style="list-style-type: none"> <li><b>51.7% (414/801) frontline medical workers and 35.6% (180/505) nonfrontline medical workers, <math>P &lt; 0.0001</math></b></li> </ul>                                                                                                                                                                                                                                                                                                                                                                                                                                                                                                                                                                                                                                                                                                                                                                                                                                                       | <b>Not peer reviewed</b><br>Response rate not reported; no non-HCW control                                                                              |
| Ying et al, 2020 (79)                                                       | Cross-sectional                 | China (Ningbo); HCWs from 5 hospitals; February 2020                                                    | 843 family members of HCWs <ul style="list-style-type: none"> <li>Mean age, 38 y</li> <li>47.3% female</li> <li>Relationship with HCW: 65.4% spouse, 4.7% child, 5.8% parent, 24.0% other</li> <li>HCW had direct contact with confirmed or suspected COVID-19-infected patient: 48.0%</li> </ul> | Prevalence of GAD score $\geq 5$ in family members of HCWs: 33.7%<br>Proportion with PHQ score $\geq 5$ in family members of HCWs: 29.4%<br><b>Adjusted OR (95% CI) for GAD score <math>\geq 5</math> in family members of HCWs (significant variables in model)</b> <ul style="list-style-type: none"> <li>Hours/day focusing on COVID-19: <b>1.22 (1.06-1.39)</b></li> <li>HCW in direct contact with confirmed or suspected COVID-19 patients: <b>1.48 (1.07-2.04)</b></li> <li>Family member's self-reported safety score for PPE of HCWs: <b>0.81 (0.70-0.93)</b></li> </ul> <b>Adjusted OR (95% CI) for PHQ-9 <math>\geq 5</math> in family members of HCWs (significant variables in model)</b> <ul style="list-style-type: none"> <li>Occupation: <ul style="list-style-type: none"> <li>Enterprise worker vs. HCW: <b>1.75 (1.10-2.78)</b></li> <li>Government employee vs. HCW: <b>0.53 (0.29-0.98)</b></li> </ul> </li> <li>Relationship: <ul style="list-style-type: none"> <li>Parent vs. spouse: <b>3.53 (1.61-7.73)</b></li> <li>Other next of kin vs. spouse: <b>1.64 (1.10-2.45)</b></li> </ul> </li> <li>Hours/day focusing on COVID-19: <b>1.20 (1.04-1.38)</b></li> <li>Average working time per week for HCWs: <b>1.02 (1.00-1.03)</b></li> </ul> | <b>Not peer reviewed</b><br>Sample limited to family members using WeChat App; no control for baseline symptoms; no controls without HCW family members |
| Zhu et al, 2020 (80)                                                        | Cross-sectional                 | Wuhan, China; tertiary hospital; 8-10 February 2020                                                     | 5062 HCWs <ul style="list-style-type: none"> <li>96.5% aged 19-49 y</li> <li>85% female</li> <li>20% physicians, 68% nurses, and 13% medical technicians</li> <li>3.1% with suspected or confirmed COVID-19</li> </ul>                                                                            | Depression symptoms (PHQ-9 $\geq 10$ ): 13.5% (681/5062)<br>Anxiety symptoms (GAD-7 $\geq 8$ ): 24.0% (1218/5062)<br>Distress symptoms (IES-R >33): 29.8% (1509/5062)<br>Adjusted OR (95% CI) for psychological distress (selected factors) <ul style="list-style-type: none"> <li>Women vs. men: <b>1.31 (1.02-1.66)</b></li> <li>Nurse vs. doctor: <b>2.24 (1.61-3.12)</b></li> <li>Medical technician vs. doctor: <b>1.57 (1.12-2.21)</b></li> <li>Working &gt;10 y vs. &lt; 2 y: <b>2.02 (1.47-2.79)</b></li> <li>Work in isolation ward vs. nonisolation: <b>1.32 (1.10-1.59)</b></li> <li>Chronic noncommunicable disease vs. in good health: <b>1.51 (1.27-1.80)</b>; history of mental disorders vs. in good health: <b>3.27 (1.77-6.05)</b></li> <li>Satisfied with coverage with protective measures vs. not satisfied: <b>0.69 (0.53-0.89)</b></li> <li>Satisfied with work shift arrangement vs. not satisfied: <b>0.45 (0.33-0.63)</b></li> <li>Satisfied with logistic support and accommodation arranged by hospital vs. not satisfied: not significant</li> </ul>                                                                                                                                                                                      | <b>Not peer reviewed</b><br>Response rate 77%; did not control for baseline symptoms; no non-HCW controls                                               |
| Liu et al, 2020 (47)                                                        | Case series                     | China (Wuhan); single hospital; diagnosed 16 January-15 February 2020                                   | 64 HCWs with COVID-19 (PCR-positive) <ul style="list-style-type: none"> <li>Median age, 35 y</li> <li>64% female</li> <li>33% doctors; 67% nurses</li> </ul>                                                                                                                                      | <ul style="list-style-type: none"> <li>Mortality: 0%</li> <li>ICU admission for mechanical ventilation: 0%</li> <li>Severe illness: 1.6% (1/64)</li> <li>Discharge (as of 24 February): 53% (34/64)</li> <li>Discharge time (median): 20 days</li> <li>Nondischarge: larger BMI (<math>\geq 24</math> kg/m<sup>2</sup>) (<b>HR, 0.14 [95% CI, 0.03-0.73]</b>), fever (<b>HR, 0.24 [95% CI, 0.09-0.60]</b>), increased IL-6 (&gt;2.9 pg/mL) (<b>HR, 0.31 [95% CI, 0.11-0.87]</b>)</li> </ul>                                                                                                                                                                                                                                                                                                                                                                                                                                                                                                                                                                                                                                                                                                                                                                            | Small sample; 47% of patients still hospitalized at time outcomes reported                                                                              |
| Liu et al, 2020 (48)                                                        | Case series                     | China (Wuhan); single hospital; diagnosed 10-31 January 2020                                            | 30 HCWs with COVID-19 (7 confirmed with PCR) <ul style="list-style-type: none"> <li>Mean age, 35 y</li> <li>66.7% female</li> <li>73.3% doctors; 26.7% nurses</li> </ul>                                                                                                                          | <ul style="list-style-type: none"> <li>Mortality: 0%</li> <li>Noninvasive ventilation or nasal high-flow oxygen: 13.3% (4/30)</li> <li>Severe pneumonia (respiratory rate <math>\geq 30</math> breaths/min, resting oxygen saturation <math>\leq 93\%</math>; PaO<sub>2</sub>/Fio<sub>2</sub> <math>\leq 300</math> mm Hg): 13.3% (4/30); severe pneumonia associated with higher BMI, greater number of exposures, and longer exposure times, and infections before use of PPE (10-20 January)</li> </ul>                                                                                                                                                                                                                                                                                                                                                                                                                                                                                                                                                                                                                                                                                                                                                             | Small sample; 20% of patients still hospitalized at time outcomes reported; most cases not confirmed with PCR                                           |
| McMichael et al, 2020 (53)                                                  | Case series                     | United States (Washington); 1 long-term care facility; initial resident case diagnosed 28 February 2020 | 50 HCWs with COVID-19 (PCR-positive) <ul style="list-style-type: none"> <li>Median age, 43.5 y</li> <li>76% female</li> <li>Various (numbers not reported)</li> </ul>                                                                                                                             | 29.9% (50/167) of cases were in HCWs <ul style="list-style-type: none"> <li>Hospitalized: 6.0% (3/50)</li> <li>Mortality: 0% (0/50)</li> </ul>                                                                                                                                                                                                                                                                                                                                                                                                                                                                                                                                                                                                                                                                                                                                                                                                                                                                                                                                                                                                                                                                                                                         | No denominator for the total number of exposed HCWs; proportion recovered at time of study not reported                                                 |
| Novel Coronavirus Pneumonia Emergency Response Epidemiology Team, 2020 (67) | Case series (descriptive study) | China (throughout); through 11 February 2020                                                            | 44 672 patients with COVID-19 (PCR-positive) <ul style="list-style-type: none"> <li>Age, sex, and role/position of infected HCWs not reported (not restricted to physicians and nurses)</li> </ul>                                                                                                | <ul style="list-style-type: none"> <li>3.8% (1716/44 672) of cases were in HCWs <ul style="list-style-type: none"> <li>Before 31 December: 0% (0/104)</li> <li>1-10 January: 3.1% (20/653)</li> <li>11-20 January: 5.7% (310/5417)</li> <li>21-31 January: 3.9% (1036/26 468)</li> </ul> </li> <li>Case-fatality rate: 0.3% (5/1716)</li> <li>Mortality per 10 patient days: 0.002</li> <li>Proportion severe or critical: 14.6% (247/1608)</li> </ul>                                                                                                                                                                                                                                                                                                                                                                                                                                                                                                                                                                                                                                                                                                                                                                                                                 | No denominator for the total number of exposed HCWs; proportion recovered unclear                                                                       |

|                            |                      |                                                                                        |                                                                                                                                                                                                                                                                                                                                                                                                                                    |                                                                                                                                                                                                                                                                                                                                                                                                                                                                                                                                                                                      |                                                                                                                                                                                   |
|----------------------------|----------------------|----------------------------------------------------------------------------------------|------------------------------------------------------------------------------------------------------------------------------------------------------------------------------------------------------------------------------------------------------------------------------------------------------------------------------------------------------------------------------------------------------------------------------------|--------------------------------------------------------------------------------------------------------------------------------------------------------------------------------------------------------------------------------------------------------------------------------------------------------------------------------------------------------------------------------------------------------------------------------------------------------------------------------------------------------------------------------------------------------------------------------------|-----------------------------------------------------------------------------------------------------------------------------------------------------------------------------------|
|                            |                      |                                                                                        |                                                                                                                                                                                                                                                                                                                                                                                                                                    | <ul style="list-style-type: none"> <li>o 1-10 January: 45.0% (9/20)</li> <li>o 11-20 January: 19.7% (61/310)</li> <li>o 21-31 January: 14.4% (149/1,036)</li> <li>o After 1 February: 8.7% (28/322)</li> <li>o Wuhan: 17.7% (191/1,080)</li> <li>o Hubei (outside Wuhan): 10.4% (41/394)</li> <li>o Outside Hubei: 7.0% (15/214)</li> </ul>                                                                                                                                                                                                                                          |                                                                                                                                                                                   |
| Wang et al, 2020 (68)      | Case series          | China (Wuhan); through 18 February 2020                                                | <p>25 961 patients with COVID-19 (PCR-positive)</p> <ul style="list-style-type: none"> <li>• Age, sex, and role/position of infected HCWs not reported</li> </ul>                                                                                                                                                                                                                                                                  | <ul style="list-style-type: none"> <li>• 5.1% (1316/25,961) of cases were in HCWs</li> <li>• Estimated attack rate in HCWs vs. general population: 144.7 (95% CI, 137.0 to 152.8) vs. 41.7 (95% CI, 41.2 to 42.2) per 10<sup>6</sup> people <ul style="list-style-type: none"> <li>o Before 11 January: 6.1 vs. 2.2 per 10<sup>6</sup> people</li> <li>o 11-22 January: 275 vs. 44.9 per 10<sup>6</sup> people</li> <li>o 23 January-1 February: 507.4 vs. 150.9 per 10<sup>6</sup> people</li> <li>o 2-18 February: 116.6 vs. 54.1 per 10<sup>6</sup> people</li> </ul> </li> </ul> | <b>Not peer-reviewed</b><br>Attack rate in general population and HCWs estimated using the Wuhan Statistical Yearbook 2018; denominator for potentially exposed HCWs not provided |
| <b>SARS-CoV-1</b>          |                      |                                                                                        |                                                                                                                                                                                                                                                                                                                                                                                                                                    |                                                                                                                                                                                                                                                                                                                                                                                                                                                                                                                                                                                      |                                                                                                                                                                                   |
| Chang et al, 2004 (25)     | Retrospective cohort | Taiwan; 1 hospital ED; 30 March-30 June 2003                                           | <p>193 HCWs</p> <ul style="list-style-type: none"> <li>• Mean age, 32.7 y</li> <li>• 72% female</li> <li>• 17% physician, 49% nurse, 8.8% radiology technician, 8.3% clerk, 6.7% sanitation worker, 6.7% administration personnel, 3.1% ambulance drivers</li> </ul>                                                                                                                                                               | <ul style="list-style-type: none"> <li>• Prevalence of SARS-CoV-1 seropositivity: 4.7% (9/193)</li> <li>• Incidence of SARS-1: 4.1% (8/193)</li> </ul>                                                                                                                                                                                                                                                                                                                                                                                                                               | No major limitations noted                                                                                                                                                        |
| Fowler et al, 2004 (30)    | Retrospective cohort | Toronto; 1 hospital intensive care unit; 1-22 April 2003                               | <p>122 intensive care unit HCWs</p> <ul style="list-style-type: none"> <li>• Mean age, 35.1 y (cases)</li> <li>• Sex not reported</li> <li>• 54% nurse, 15% nursing aid/patient assistant, 12% physician, 15% respiratory therapist, 2.5% physiotherapist, 1.6% other HCW</li> </ul>                                                                                                                                               | Incidence of SARS-1: 8.2% (10/122)                                                                                                                                                                                                                                                                                                                                                                                                                                                                                                                                                   | No major limitations noted                                                                                                                                                        |
| Ho et al, 2003 (32)        | Retrospective cohort | Hong Kong; 1 hospital; 25 March to 5 May, 2003                                         | <p>1,053 HCWs</p> <ul style="list-style-type: none"> <li>• Mean age (cases) 36 y</li> <li>• 78% female (cases)</li> <li>• 13% physician, 47% nurse, 8.4% health care assistant, 10.5% cleaner, 12.4% clerical staff</li> </ul>                                                                                                                                                                                                     | Incidence of SARS-1: 3.8% (40/1053)                                                                                                                                                                                                                                                                                                                                                                                                                                                                                                                                                  | No major limitations noted                                                                                                                                                        |
| Ho et al, 2004 (33)        | Prospective cohort   | Singapore; 1 hospital; 18 March-29 April 2003                                          | <p>372 HCWs</p> <ul style="list-style-type: none"> <li>• Mean age, 34.2 y</li> <li>• 77% female</li> <li>• 27.7% physician, 55.1% nurse, 17.2% allied health and clerical</li> </ul>                                                                                                                                                                                                                                               | <ul style="list-style-type: none"> <li>• Prevalence of SARS-CoV-1 seropositivity: 2.2% (8/372)</li> <li>• Incidence of SARS-1: 1.6% (6/372)</li> </ul>                                                                                                                                                                                                                                                                                                                                                                                                                               | No major limitations noted                                                                                                                                                        |
| Ip et al, 2004 (34)        | Retrospective cohort | Hong Kong; 1 hospital; blood samples obtained after 21 May 2003                        | <p>742 HCWs</p> <ul style="list-style-type: none"> <li>• Mean age, 36.2 y (HCWs with serologic testing)</li> <li>• 79% female (HCWs with serologic testing)</li> <li>• 9.0% doctor, 3% nurse, 23% allied health, 14% health care/general service assistant, 13% ancillary, 3.7% other</li> </ul>                                                                                                                                   | Incidence of SARS-1: 7.1% (53/742)                                                                                                                                                                                                                                                                                                                                                                                                                                                                                                                                                   | No major limitations noted                                                                                                                                                        |
| Jiang et al, 2003 (35)     | Retrospective cohort | China (Guangzhou); 1 hospital; 30 January-March 2003                                   | <p>431 HCWs</p> <ul style="list-style-type: none"> <li>• Age, sex, role/type of HCW not reported</li> </ul>                                                                                                                                                                                                                                                                                                                        | Incidence of SARS-1: 17.9% (77/431)                                                                                                                                                                                                                                                                                                                                                                                                                                                                                                                                                  | No major limitations noted                                                                                                                                                        |
| Lau et al, 2004 (43)       | Retrospective cohort | Hong Kong; 16 hospitals; 4 March to 31 May 2003                                        | <p>~28 000 HCWs</p> <ul style="list-style-type: none"> <li>• Age, sex, and HCW role/position not reported</li> </ul>                                                                                                                                                                                                                                                                                                               | Incidence of SARS-1: 1.2% (339/~28,000)                                                                                                                                                                                                                                                                                                                                                                                                                                                                                                                                              | SARS-1 criteria not reported                                                                                                                                                      |
| Li et al, 2003 (45)        | Retrospective cohort | China (Beijing); 1 hospital; 24 March-13 May 2003                                      | <p>770 HCWs</p> <ul style="list-style-type: none"> <li>• Age, sex and health care role/position not reported</li> </ul>                                                                                                                                                                                                                                                                                                            | Incidence of SARS-1: 2.43% (18/770)                                                                                                                                                                                                                                                                                                                                                                                                                                                                                                                                                  | No major limitations noted                                                                                                                                                        |
| Loeb et al, 2004 (50)      | Retrospective cohort | Canada (Toronto); 1 hospital critical care units; 8-16 March 2003                      | <p>43 nurses</p> <ul style="list-style-type: none"> <li>• Mean age, 41 y</li> <li>• 100% female</li> </ul>                                                                                                                                                                                                                                                                                                                         | Incidence of SARS-1: 18.6% (8/50)                                                                                                                                                                                                                                                                                                                                                                                                                                                                                                                                                    | No major limitations noted                                                                                                                                                        |
| Nishiyama et al, 2008 (57) | Retrospective cohort | Vietnam (Hanoi); two hospitals; exposure 3-17 March 2003                               | <p>146 HCWs</p> <ul style="list-style-type: none"> <li>• Age, sex, and HCW role/position not reported</li> </ul>                                                                                                                                                                                                                                                                                                                   | <ul style="list-style-type: none"> <li>• Prevalence of SARS-CoV-1 seropositivity: 40.4% (59/146)</li> <li>• Incidence of SARS-1: 29.4% (43/146)</li> </ul>                                                                                                                                                                                                                                                                                                                                                                                                                           | No major limitations noted                                                                                                                                                        |
| Raboud et al, 2010 (60)    | Retrospective cohort | Canada (Toronto); 20 hospitals; 5 March-12 June 2003                                   | <p>624 HCWs provided care to intubated SARS-1 patients</p> <ul style="list-style-type: none"> <li>• Mean age 38.5 y (cases)</li> <li>• 75.2% female</li> <li>• 12.3% staff physician, 2.6% medical resident/intern, 45.4% registered nurse, 14.3% respiratory therapist, 10.7% radiology technologist, 6.1% housekeeper, 4.2% personal service assistant, 2.2% laboratory technician/technologist, 0.5% EMT; 1.8% other</li> </ul> | Prevalence of SARS-CoV-1 seropositivity: 4.2% (26/624)                                                                                                                                                                                                                                                                                                                                                                                                                                                                                                                               | SARS-1 diagnosis did not require laboratory confirmation                                                                                                                          |
| Scales et al, 2003 (64)    | Retrospective cohort | Canada (Toronto); single hospital intensive care unit; exposure occurred 23 March 2003 | <p>69 HCWs with brief, unexpected exposure to SARS-1-infected patient</p> <ul style="list-style-type: none"> <li>• Age, sex, HCW role/position not reported</li> </ul>                                                                                                                                                                                                                                                             | Incidence of SARS-1: 10.1% (7/69)                                                                                                                                                                                                                                                                                                                                                                                                                                                                                                                                                    | No major limitations noted                                                                                                                                                        |

|                                                   |                      |                                                                                |                                                                                                                                                                                                                                                                                   |                                                                                                                                                                                                                                                                                                                                                                                                                                                                                                                                                                                                                                                                                                                                                                                                                                                                                                                                                                                                                                                                                                                                                                                                                                           |                                                                                                                                                               |
|---------------------------------------------------|----------------------|--------------------------------------------------------------------------------|-----------------------------------------------------------------------------------------------------------------------------------------------------------------------------------------------------------------------------------------------------------------------------------|-------------------------------------------------------------------------------------------------------------------------------------------------------------------------------------------------------------------------------------------------------------------------------------------------------------------------------------------------------------------------------------------------------------------------------------------------------------------------------------------------------------------------------------------------------------------------------------------------------------------------------------------------------------------------------------------------------------------------------------------------------------------------------------------------------------------------------------------------------------------------------------------------------------------------------------------------------------------------------------------------------------------------------------------------------------------------------------------------------------------------------------------------------------------------------------------------------------------------------------------|---------------------------------------------------------------------------------------------------------------------------------------------------------------|
| Wang et al, 2007 (69)                             | Retrospective cohort | Taiwan; 4 hospitals; study began 1 July 2003                                   | 2512 HCWs <ul style="list-style-type: none"> <li>• Mean age, 33.4 y</li> <li>• 88% female</li> <li>• 13% physician, 83% nurse</li> <li>• 0.36% (9/2512) seropositive for SARS-CoV-1; 1.0% (9/882) among those reporting contact with SARS-1 patients</li> </ul>                   | Prevalence of seropositivity to SARS-CoV-1: 0.3% (9/2512); 1.0% (9/882) among those reporting contact with SARS-1 patients                                                                                                                                                                                                                                                                                                                                                                                                                                                                                                                                                                                                                                                                                                                                                                                                                                                                                                                                                                                                                                                                                                                | No major limitations noted                                                                                                                                    |
| Wong et al, 2004 (74)                             | Retrospective cohort | Hong Kong; 1 hospital; 4-10 March 2003                                         | 66 medical students <ul style="list-style-type: none"> <li>• Mean age, 22.3 y (cases)</li> <li>• 50% female (cases)</li> <li>• 24% (16/66) diagnosed with SARS-1</li> </ul>                                                                                                       | Incidence of SARS-1: 24% (16/66)                                                                                                                                                                                                                                                                                                                                                                                                                                                                                                                                                                                                                                                                                                                                                                                                                                                                                                                                                                                                                                                                                                                                                                                                          | No major limitations noted                                                                                                                                    |
| Chen et al, 2005 (27)                             | Cross-sectional      | China (Guangzhou); 3 hospitals; May 2003                                       | 1856 HCWs (1135 worked with SARS patients) <ul style="list-style-type: none"> <li>• Mean age, 30.8 y</li> <li>• 71.6% female</li> <li>• 30.7% doctor, 48.3% nurse, 5.5% health attendant, 4.0% laboratory technician, 11.5% other</li> </ul>                                      | <ul style="list-style-type: none"> <li>• Prevalence of SARS-CoV-1 seropositivity among HCWs who worked with SARS patients: 8.3% (95/1147)</li> <li>• Incidence of SARS-1: 7.8% (90/1147)</li> </ul>                                                                                                                                                                                                                                                                                                                                                                                                                                                                                                                                                                                                                                                                                                                                                                                                                                                                                                                                                                                                                                       | 10 patients with SARS-1 were SARS-CoV-1 seronegative                                                                                                          |
| Leung et al, 2004 (44)                            | Case series          | Hong Kong; All cases 2003 outbreak                                             | 1755 SARS-1 cases (405 HCWs) <ul style="list-style-type: none"> <li>• 48% aged <math>\leq 39</math> y of age, 30% aged 40-59 y (all cases)</li> <li>• 55.7% female (all cases)</li> <li>• 15.8% physician, 51.9% nurse, 28.4% other, 4.0% medical students</li> </ul>             | <ul style="list-style-type: none"> <li>• 23.1% (405/1755) of cases were in HCWs</li> <li>• Mortality: 2.0% (8/405) <ul style="list-style-type: none"> <li>• Physician: 6.2% (4/64)</li> <li>• Nurse: 0.5% (1/210)</li> <li>• Medical student: 0% (0/16)</li> <li>• Other HCW: 2.6% (3/115)</li> </ul> </li> <li>• Adjusted OR (95% CI) for mortality <ul style="list-style-type: none"> <li>• HCW vs. non-HCW: <b>0.30 (0.1-0.7)</b></li> </ul> </li> </ul>                                                                                                                                                                                                                                                                                                                                                                                                                                                                                                                                                                                                                                                                                                                                                                               | 288 cases without laboratory confirmation; based on studies with laboratory confirmation, adjusted OR for mortality for HCW vs. non-HCW 0.6 (95% CI, 0.2-1.3) |
| <b>MERS-CoV</b><br>Al-Abdallat M et al, 2014 (18) | Retrospective cohort | Jordan; 3 hospitals; exposure 15 March-30 April 2012, study done May 2013      | 97 HCWs <ul style="list-style-type: none"> <li>• Age, sex, HCW role/position not reported</li> </ul>                                                                                                                                                                              | <ul style="list-style-type: none"> <li>• Incidence of MERS-CoV seropositivity in HCWs overall: 6.2% (6/97)</li> <li>• Mortality: 16.7% (1/6)</li> <li>• Outbreak hospital HCWs: 10% (6/57)</li> <li>• Other HCWs (transfer hospital, outbreak investigators): 0% (0/40)</li> <li>• Incidence of MERS-Co seropositivity in HCWs: 7.1% (20/283); 8.0% (20/250) in units with direct contact <ul style="list-style-type: none"> <li>• MICU: 11.7% (15/128)</li> <li>• ED: 4.1% (5/122)</li> <li>• Neurology unit (no direct contact): 0% (0/33)</li> <li>• Radiology technician (MICU and ED): 29.4% (5/17)</li> <li>• Nurses (MICU and ED): 9.4% (13/138)</li> <li>• Respiratory therapist (MICU and ED): 3.2% (1/31)</li> <li>• Physicians (MICU and ED): 2.4% (1/41)</li> <li>• Patient transport or clerical staff (MICU and ED): 0% (0/21)</li> </ul> </li> <li>• Mortality: 0% (0/20)</li> <li>• Mechanical ventilation: 15% (3/20)</li> <li>• Hospital admission without mechanical ventilation: 10% (2/20)</li> <li>• Incidence of positivity for MERS-CoV PCR: 1.9% (17/879) <ul style="list-style-type: none"> <li>• Mortality: 0%</li> <li>• Asymptomatic: 53% (8/15)</li> <li>• Mild symptoms: 47% (7/15)</li> </ul> </li> </ul> | Small number of cases; clinical presentation of 5 nonfatal cases not described                                                                                |
| Alraddadi et al, 2016 (19)                        | Retrospective cohort | Saudi Arabia; 1 hospital; May 2014-June 2014                                   | 283 HCWs <ul style="list-style-type: none"> <li>• Mean age, 40 y (cases)</li> <li>• 64.4% female</li> <li>• 55% nurse, 16% physician, 12% respiratory therapist, 6.8% radiology technicians, 9.2% other (MICU and ED HCWs)</li> </ul>                                             | <ul style="list-style-type: none"> <li>• Incidence of MERS: 2.0% (15/737)</li> <li>• Incidence of MERS-CoV seropositivity (ELISA and confirmatory IIFT) not meeting criteria for MERS: 0.27% (2/737)</li> </ul>                                                                                                                                                                                                                                                                                                                                                                                                                                                                                                                                                                                                                                                                                                                                                                                                                                                                                                                                                                                                                           | Potential recall bias                                                                                                                                         |
| Amer et al, 2018(21)                              | Retrospective cohort | Saudi Arabia; 1 hospital; June 2017                                            | 879 HCWs with unprotected exposure to MERS patient <ul style="list-style-type: none"> <li>• Mean age, 32 y (15 cases)</li> <li>• 80.0% female (15 cases)</li> <li>• 80% nurse, 20% physician</li> </ul>                                                                           | <ul style="list-style-type: none"> <li>• Mortality: 0%</li> <li>• Asymptomatic: 53% (8/15)</li> <li>• Mild symptoms: 47% (7/15)</li> </ul>                                                                                                                                                                                                                                                                                                                                                                                                                                                                                                                                                                                                                                                                                                                                                                                                                                                                                                                                                                                                                                                                                                | Two patients with inadequate follow-up                                                                                                                        |
| Kim et al, 2016 (37)                              | Retrospective cohort | South Korea; 31 hospitals; dates not reported                                  | 737 HCWs with direct contact with MERS patient <ul style="list-style-type: none"> <li>• Mean age, 33 y</li> <li>• 78% female</li> <li>• 19% physician; 69% nurse; 12% other</li> </ul>                                                                                            | <ul style="list-style-type: none"> <li>• Incidence of MERS in HCWs: 11% (1/9)</li> <li>• Case was a security guard with no PPE</li> </ul>                                                                                                                                                                                                                                                                                                                                                                                                                                                                                                                                                                                                                                                                                                                                                                                                                                                                                                                                                                                                                                                                                                 | No details on outcomes of MERS cases                                                                                                                          |
| Kim et al, 2016 (38)                              | Retrospective cohort | South Korea; 1 hospital ED; exposure May 26, 2015 with testing 3-6 weeks later | 9 HCWs within 3-6 ft of MERS patient <ul style="list-style-type: none"> <li>• 56% aged <math>&lt; 30</math> y</li> <li>• 56% female</li> <li>• 33% doctor, 44% nurse, 11% nurse assistant, 11% security guard</li> </ul>                                                          | <ul style="list-style-type: none"> <li>• Incidence of MERS-CoV seropositivity: 0% (0/34)</li> </ul>                                                                                                                                                                                                                                                                                                                                                                                                                                                                                                                                                                                                                                                                                                                                                                                                                                                                                                                                                                                                                                                                                                                                       | No cases; small sample size                                                                                                                                   |
| Ryu et al, 2019 (63)                              | Retrospective cohort | South Korea; public health center and EMS personnel; January 2016              | 34 HCWs with contact with MERS patient <ul style="list-style-type: none"> <li>• Mean age, 44 y</li> <li>• 41.2% female</li> <li>• 32% general health care staff, 18% nurses; 12% doctors, 8.8% paramedics; 2.6% lab technician; 26.5% non-health-related workers</li> </ul>       | <ul style="list-style-type: none"> <li>• Incidence of MERS-CoV seropositivity: 0% (0/38)</li> </ul>                                                                                                                                                                                                                                                                                                                                                                                                                                                                                                                                                                                                                                                                                                                                                                                                                                                                                                                                                                                                                                                                                                                                       | No cases                                                                                                                                                      |
| Wiboonchutikul et al, 2016 (71)                   | Retrospective cohort | Thailand; 1 hospital; exposure 18 June-3 July 2015                             | 38 HCWs with exposure to MERS patient <ul style="list-style-type: none"> <li>• Mean age, 38.1 y</li> <li>• 79% female</li> <li>• 7.9% physician, 21% nurse, 7.9% nursing or patient assistant, 21% radiology technician, 39.4% laboratory personnel, 2.6% housekeeping</li> </ul> | <ul style="list-style-type: none"> <li>• Incidence of MERS-CoV seropositivity: 0% (0/38)</li> </ul>                                                                                                                                                                                                                                                                                                                                                                                                                                                                                                                                                                                                                                                                                                                                                                                                                                                                                                                                                                                                                                                                                                                                       | No cases                                                                                                                                                      |
| Memish et al, 2014(54)                            | Cross-sectional      | Saudi Arabia; hospitals throughout country; September 2012 to September 2013   | 1695 HCWs (contacts of MERS patients) <ul style="list-style-type: none"> <li>• Age, sex, HCW role/position not reported</li> </ul>                                                                                                                                                | <ul style="list-style-type: none"> <li>• Prevalence of MERS-CoV PCR positivity: 1.12% (19/1695) <ul style="list-style-type: none"> <li>• Female: 1.30% (15/1155)</li> <li>• Male: 0.74% (4/540)</li> </ul> </li> </ul>                                                                                                                                                                                                                                                                                                                                                                                                                                                                                                                                                                                                                                                                                                                                                                                                                                                                                                                                                                                                                    | No detail on clinical presentation, no information on HCW role/position                                                                                       |

|                                    |             |                                                                                                                                 |                                                                                                                                                                                     |                                                                                                                                                                                                                                                                                                                                                                                                                                                                                                                                                                                                                                                                                                                                                                               |                                                                                             |
|------------------------------------|-------------|---------------------------------------------------------------------------------------------------------------------------------|-------------------------------------------------------------------------------------------------------------------------------------------------------------------------------------|-------------------------------------------------------------------------------------------------------------------------------------------------------------------------------------------------------------------------------------------------------------------------------------------------------------------------------------------------------------------------------------------------------------------------------------------------------------------------------------------------------------------------------------------------------------------------------------------------------------------------------------------------------------------------------------------------------------------------------------------------------------------------------|---------------------------------------------------------------------------------------------|
| Adegboye et al, 2019 (17)          | Case series | Saudi Arabia; throughout Saudi Arabia; 2012-2016                                                                                | 787 cases of MERS (166 HCWs) <ul style="list-style-type: none"> <li>• Mean age, 35 y (HCWs)</li> <li>• 37% female (HCWs)</li> <li>• HCW role/position not reported</li> </ul>       | Mortality in HCWs with MERS: 3.0% (5/166) <p>Adjusted OR (95% CI) for mortality</p> <ul style="list-style-type: none"> <li>• HCW vs. non-HCW: <b>0.08 (0.03 to 0.40)</b></li> <li>• Comorbidity vs. no comorbidity: <b>2.43 (1.11-5.33)</b></li> <li>• Male vs. female: 1.41 (0.83-2.40)</li> <li>• Age (per year): <b>1.03 (1.01-1.04)</b></li> </ul>                                                                                                                                                                                                                                                                                                                                                                                                                        | Potential residual confounding                                                              |
| Al-Tawfiq and Memish, 2019 (20)    | Case series | Lebanon, Malaysia, Oman, Qatar, Saudi Arabia, and United Arab Emirates (cases report to WHO) from December 2016 to January 2019 | 403 MERS cases (105 HCWs) <ul style="list-style-type: none"> <li>• Mean age, 47.7 y (HCWs)</li> <li>• 25.6% female (all cases)</li> <li>• HCW role/position not reported</li> </ul> | 26.1% (105/403) of cases were in HCWs <ul style="list-style-type: none"> <li>• Mortality: 16% (17/105)</li> </ul>                                                                                                                                                                                                                                                                                                                                                                                                                                                                                                                                                                                                                                                             | Mortality in HCWs includes primary cases; no analysis of risk factors for mortality in HCWs |
| Bernard-Stoecklin et al, 2019 (22) | Case series | South Korea; 11 health care-associated outbreaks; 2015-2017                                                                     | 2260 cases with MERS (105 HCWs) <ul style="list-style-type: none"> <li>• Age, sex, role/position of HCWs not reported</li> </ul>                                                    | Adjusted OR (95% CI) for mortality in persons with MERS <ul style="list-style-type: none"> <li>• HCW vs. not HCW: <b>0.07 (0.001-0.35)</b></li> <li>• Age ≥65 y vs. &lt;65 y: <b>4.79 (2.60-8.64)</b></li> <li>• ≥1 underlying comorbid condition vs. no comorbid conditions: <b>0.07 (0.001-0.35)</b></li> </ul>                                                                                                                                                                                                                                                                                                                                                                                                                                                             | Potential residual confounding                                                              |
| Elkholy et al, 2020 (29)           | Case series | Worldwide (all cases reported to WHO) from September 2012-2 June 2018                                                           | 2223 MERS cases (415 HCWs) <ul style="list-style-type: none"> <li>• Mean age, 39.3 y (HCWs)</li> <li>• Female: 54.9% (HCWs)</li> <li>• HCW role/position not reported</li> </ul>    | 18.6% (415/2223) of cases were in HCWs <ul style="list-style-type: none"> <li>• Mortality: 5.8% (24/415)</li> <li>• Secondary cases: 4.7% (16/338)</li> <li>• Diagnosis year: <ul style="list-style-type: none"> <li>○ 2013: 18.9% (7/30)</li> <li>○ 2014: 8.0% (16/200)</li> <li>○ 2015: 1.1% (1/95)</li> <li>○ 2016: 0% (0/34)</li> <li>○ 2017: 0% (0/45)</li> <li>○ 2018: 0% (0/4)</li> </ul> </li> </ul> <p>Adjusted OR (95% CI) for mortality in HCWs with secondary MERS (factors in backwards stepwise model)</p> <ul style="list-style-type: none"> <li>• Year of infection (2013-2018): <b>0.17 (0.07-0.45)</b></li> <li>• Comorbidity (none vs. any): <b>0.22 (0.05-0.92)</b></li> <li>• Factors not retained in model: sex, residency, symptomatic, age</li> </ul> | No information on HCW role/position                                                         |

BMI = body mass index; CoV = coronavirus; COVID-19 = coronavirus disease 2019; ED = emergency department; EMT = emergency medical technician; GAD = generalized anxiety disorder; GHQ = General Health Questionnaire; HAMA = Hamilton Anxiety Scale; HAM-D = Hamilton Depression Scale; HCW = health care worker; IES-R = Impact of Event Scale-Revised; IL = interleukin; ISI = Insomnia Severity Index; MERS = Middle East respiratory syndrome; MICU = medical intensive care unit; NRS = numeric rating scale; PCR = polymerase chain reaction; PHQ = Patient Health Questionnaire; PPE = personal protective equipment; SARS = severe acute respiratory syndrome; WHO = World Health Organization.

\* Values in boldface and italics indicate a statistically significant difference between groups.

**Appendix Table 4. Cases of SARS-1 and MERS Reported to the World Health Organization, Overall and in HCWs**

| <b>Country, Time Frame (Reference)</b>           | <b>Overall Cases, <i>n</i></b> | <b>HCW Cases, <i>n</i> (%)</b> |
|--------------------------------------------------|--------------------------------|--------------------------------|
| <b>SARS-1, 1 November 2002-31 July 2003 (81)</b> |                                |                                |
| Canada                                           | 251                            | 109 (43)                       |
| China                                            | 5327                           | 1002 (19)                      |
| China, Hong Kong                                 | 1755                           | 386 (22)                       |
| China, Taiwan                                    | 346                            | 68 (20)                        |
| Singapore                                        | 238                            | 97 (41)                        |
| Vietnam                                          | 63                             | 36 (57)                        |
| Total*                                           | 8096                           | 1706 (21)                      |
| <b>MERS (82)</b>                                 |                                |                                |
| Saudi Arabia, 2012-2019                          | 2106                           | 402 (19)                       |
| Globally, July-December 2014                     | 100                            | 14 (14)                        |
| Globally, July-December 2015                     | 257                            | 46 (18)                        |
| Globally, July-December 2016                     | 99                             | 6 (6)                          |
| Globally, July-December 2017                     | 94                             | 9 (8)                          |
| Globally, July-December 2018                     | 50                             | 0 (0)                          |
| Globally, July-December 2019                     | 51                             | 2 (4)                          |

HCW = health care worker; MERS = Middle East respiratory syndrome; SARS = severe acute respiratory syndrome.

\* Includes countries with <50 cases not shown in table.



Appendix Table 5. Results of Individual Studies and Risk Factors for SARS-CoV-2, SARS-CoV-1, and MERS-CoV Infection in HCWs\*

| Study, Year (Reference) | Study Design         | Setting and Study Dates                                                             | Population Characteristics                                                                                                                                                                                                                                                             | Outcomes                                                                                                                                                                                                                                                                                                                                                                                                                                                                                                                                                                                                                                                                                                                                                                                                                                                                                                                                                                                                                                                                                                                                                                                                                                                        | Limitations                                                                                                                                                                      |
|-------------------------|----------------------|-------------------------------------------------------------------------------------|----------------------------------------------------------------------------------------------------------------------------------------------------------------------------------------------------------------------------------------------------------------------------------------|-----------------------------------------------------------------------------------------------------------------------------------------------------------------------------------------------------------------------------------------------------------------------------------------------------------------------------------------------------------------------------------------------------------------------------------------------------------------------------------------------------------------------------------------------------------------------------------------------------------------------------------------------------------------------------------------------------------------------------------------------------------------------------------------------------------------------------------------------------------------------------------------------------------------------------------------------------------------------------------------------------------------------------------------------------------------------------------------------------------------------------------------------------------------------------------------------------------------------------------------------------------------|----------------------------------------------------------------------------------------------------------------------------------------------------------------------------------|
| <b>SARS-CoV-2</b>       |                      |                                                                                     |                                                                                                                                                                                                                                                                                        |                                                                                                                                                                                                                                                                                                                                                                                                                                                                                                                                                                                                                                                                                                                                                                                                                                                                                                                                                                                                                                                                                                                                                                                                                                                                 |                                                                                                                                                                                  |
| Ran et al, 2020 (61)    | Retrospective cohort | China (Wuhan); 1 hospital serving outbreak; follow-up through 28 January 2020       | 72 HCW with acute symptoms <ul style="list-style-type: none"> <li>• Median age, 31 y</li> <li>• 69% female</li> <li>• 53% clinicians and 47% nurses</li> <li>• 38.9% (28/72) diagnosed with COVID-19</li> </ul>                                                                        | RR (95% CI) for COVID-19 (PCR) <ul style="list-style-type: none"> <li>• High-risk vs. general department: <b>2.13 (1.45-3.95)</b></li> <li>• High-exposure operation: 0.54 (0.19-1.53)</li> <li>• Tracheal tube removal: 0.63 (0.06-7.08)</li> <li>• CPR: 0.63 (0.06-7.08)</li> <li>• Fiberoptic bronchoscopy: 0.63 (0.06-7.08)</li> <li>• Sputum suction: 0.43 (0.12-1.55)</li> <li>• Unqualified handwashing: <b>2.64 (1.04-6.71)</b></li> <li>• Suboptimal handwashing before patient contact: <b>3.10 (1.43-6.73)</b></li> <li>• Suboptimal handwashing after patient contact: <b>2.43 (1.34-4.39)</b></li> <li>• Improper PPE (proper PPE defined as use of hospital masks, round caps, gloves, protective clothing, boot covers, and goggles or face shields): <b>2.82 (1.11-7.18)</b></li> <li>• Increase in work hours: <b>log-rank P = 0.02</b> with interaction with high-risk department</li> </ul> <p>Contact history:</p> <ul style="list-style-type: none"> <li>• Diagnosed family member: <b>2.76 (2.02-3.77)</b></li> <li>• Suspected family member: 1.30 (0.31-5.35)</li> <li>• Diagnosed patient: <b>0.36 (0.22-0.59)</b></li> <li>• Suspected patient: <b>0.49 (0.27-0.89)</b></li> <li>• Huanan seafood market: 0.63 (0.06-7.08)</li> </ul> | Potential recall bias; unclear if most risk estimates adjusted; reference group unclear for some estimates; some estimates imprecise; 11 of 83 cases dropped for invalid surveys |
| Ng et al, 2020 (55)     | Retrospective cohort | Singapore; February 2020                                                            | 41 HCWs with exposure to COVID-19 patient and aerosol-generating procedures for ≥10 min at ≤2 m <ul style="list-style-type: none"> <li>• Age, sex, and HCW role/position not reported</li> <li>• 0% (0/41) diagnosed with SARS-CoV-2 infection</li> </ul>                              | Incidence of SARS-CoV-2 infection in exposed HCWs: 0% (0/41); no HCWs developed symptoms <ul style="list-style-type: none"> <li>• Aerosol-generating procedures: endotracheal intubation (n = 10), extubation (n = 2), noninvasive ventilation (n = 25), other (n = 4)</li> <li>• Mask type during exposures: surgical mask, 85%; N95, 15%</li> </ul>                                                                                                                                                                                                                                                                                                                                                                                                                                                                                                                                                                                                                                                                                                                                                                                                                                                                                                           | No cases of COVID-19 occurred                                                                                                                                                    |
| Wang et al, 2020 (70)   | Retrospective cohort | China (Wuhan); 1 hospital; January 2020                                             | 493 HCWs <ul style="list-style-type: none"> <li>• Mean age, 32 y</li> <li>• 87% female</li> <li>• 27% doctor, 73% nurse</li> <li>• 2.0% (10/493) diagnosed with COVID-19</li> </ul>                                                                                                    | Incidence of COVID-19 <ul style="list-style-type: none"> <li>• Respiratory department: 0% (0/70)</li> <li>• ICU: 0% (0/169)</li> <li>• Infectious disease department: 0% (0/39)</li> <li>• Hepatobiliary and pancreatic surgery department: 11% (8/74)</li> <li>• Trauma and microsurgery department: 2% (1/44)</li> <li>• Urology department: 1% (1/97)</li> </ul> <p>Unadjusted OR (95% CI)</p> <p>Nurse vs. doctor: <b>0.04 (95% CI 0.005 to 0.31)†</b></p> <ul style="list-style-type: none"> <li>• In department with N95 mask use (no vs. yes): <b>28.46 (1.65 to 488.48)†</b></li> </ul> <p>Adjusted OR (95% CI) for COVID-19</p> <ul style="list-style-type: none"> <li>• In department with N95 mask use (no vs. yes): <b>464.82 (97.73-∞)</b></li> </ul>                                                                                                                                                                                                                                                                                                                                                                                                                                                                                              | Not peer reviewed; mask and other PPE use based on department practice, not individual participant use; estimate for mask very imprecise                                         |
| <b>SARS-CoV-1</b>       |                      |                                                                                     |                                                                                                                                                                                                                                                                                        |                                                                                                                                                                                                                                                                                                                                                                                                                                                                                                                                                                                                                                                                                                                                                                                                                                                                                                                                                                                                                                                                                                                                                                                                                                                                 |                                                                                                                                                                                  |
| Caputo et al, 2006 (23) | Retrospective cohort | Canada (Toronto); 10 hospitals; February to 21 April 2003 and 22 April to July 2003 | 33 HCWs who performed 39 tracheal intubations in 35 SARS-1 patients <ul style="list-style-type: none"> <li>• Age, sex not reported</li> <li>• 67% anesthesiologist; 15% respiratory therapist; 9% internal medicine; 9% other physicians</li> <li>• 9.1% (3/33) with SARS-1</li> </ul> | Unadjusted OR (95% CI) for SARS-1† <ul style="list-style-type: none"> <li>• N95 or N95 equivalent vs. surgical mask: 0.12 (0.01-1.92)</li> <li>• 2 glove layers vs. 1 layer: <b>0.04 (0.002-0.78)</b></li> <li>• Goggles vs. no goggles: 0.10 (0.01-1.29)</li> <li>• Face shield vs. no face shield: 0.79 (0.06-9.50)</li> <li>• Powered air purifying respirator or Stryker suit vs. no personal protective system: 0.20 (0.01-4.12)</li> </ul>                                                                                                                                                                                                                                                                                                                                                                                                                                                                                                                                                                                                                                                                                                                                                                                                                | Potential recall bias; no control for confounders                                                                                                                                |
| Chang et al, 2004 (25)  | Retrospective cohort | Taiwan; 1 hospital ED; 30 March-30 June 2003                                        | 193 HCWs <ul style="list-style-type: none"> <li>• Mean age, 32.7 y</li> </ul>                                                                                                                                                                                                          | Prevalence of SARS-CoV-1 seropositivity <ul style="list-style-type: none"> <li>• Physicians: 6.1% (2/33)</li> </ul>                                                                                                                                                                                                                                                                                                                                                                                                                                                                                                                                                                                                                                                                                                                                                                                                                                                                                                                                                                                                                                                                                                                                             | No control for confounding; few cases                                                                                                                                            |

|                         |                      |                                                                 |                                                                                                                                                                                                                                                                                                                                         |                                                                                                                                                                                                                                                                                                                                                                                                                                                                                                                                                                                                                                                                                                                                                                                            |                                                                                                                                |
|-------------------------|----------------------|-----------------------------------------------------------------|-----------------------------------------------------------------------------------------------------------------------------------------------------------------------------------------------------------------------------------------------------------------------------------------------------------------------------------------|--------------------------------------------------------------------------------------------------------------------------------------------------------------------------------------------------------------------------------------------------------------------------------------------------------------------------------------------------------------------------------------------------------------------------------------------------------------------------------------------------------------------------------------------------------------------------------------------------------------------------------------------------------------------------------------------------------------------------------------------------------------------------------------------|--------------------------------------------------------------------------------------------------------------------------------|
|                         |                      |                                                                 | <ul style="list-style-type: none"> <li>72% female</li> <li>17% physician, 49% nurse, 8.8% radiology technician, 8.3% clerk, 6.7% sanitation worker, 6.7% administration personnel, 3.1% ambulance drivers</li> <li>4.7% (9/193) seropositive for SARS-CoV-1 (8 met criteria for SARS-1)</li> </ul>                                      | <ul style="list-style-type: none"> <li>Nurses: 3.2% (3/95)</li> <li>Ambulance drivers: 16.7% (1/6)</li> <li>Sanitation workers: 15.4% (2/13)</li> <li>Clerks: 6.3% (1/16)</li> <li>Radiology technicians: 0% (0/17)</li> <li>Administrative personnel: 0% (0/24)</li> </ul>                                                                                                                                                                                                                                                                                                                                                                                                                                                                                                                |                                                                                                                                |
| Fowler et al, 2004 (30) | Retrospective cohort | Toronto; 1 hospital intensive care unit; 1-22 April 2003        | <p>122 intensive care unit HCWs</p> <ul style="list-style-type: none"> <li>Mean age, 35.1 y (cases)</li> <li>Sex not reported</li> <li>54% nurse, 15% nursing aid/patient assistant, 12% physician, 15% respiratory therapist, 2.5% physiotherapist, 1.6% other HCW</li> <li>8.2% (10/122) diagnosed with SARS-1</li> </ul>             | <p>Incidence of SARS-1</p> <ul style="list-style-type: none"> <li>Physicians: 16.7% (3/18)</li> <li>Nurses: 7.6% (5/66)</li> <li>Respiratory therapist: 11.1% (2/18)</li> </ul> <p>Unadjusted RR (95% CI) for SARS-1</p> <ul style="list-style-type: none"> <li>Any involvement in intubation vs. no involvement, physician or nurse: <b>13.29 (2.99-59.04)</b> <ul style="list-style-type: none"> <li>Nurse: <b>21.38 (4.89-93.37)</b></li> <li>Physician: 3.82 (0.23-62.24)</li> </ul> </li> <li>Cared for patient treated with noninvasive positive pressure vs. conventional ventilation (restricted to nurses): 2.33 (0.25-21.76)</li> <li>Cared for patient treated with high frequency oscillatory vs. conventional ventilation (restricted to nurses): 0.74 (0.11-4.92)</li> </ul> | No control for confounding; some estimates imprecise                                                                           |
| Ho et al, 2003 (32)     | Retrospective cohort | Hong Kong; 1 hospital; 25 March-5 May 2003                      | <p>1053 HCWs</p> <ul style="list-style-type: none"> <li>Mean age, (cases) 36 y</li> <li>78% female (cases)</li> <li>13% physician, 47% nurse, 8.4% health care assistant, 10.5% cleaner, 12.4% clerical staff</li> <li>3.8% (40/1053) diagnosed with SARS-1</li> </ul>                                                                  | <p>Incidence of SARS-1</p> <ul style="list-style-type: none"> <li>Physician: 5.1% (7/138)</li> <li>Nurse: 3.8% (19/500)</li> <li>Health care assistant: 7.9% (10/126)</li> <li>Cleaner: 1.9% (3/158)</li> <li>Clerical staff: 0.8% (1/131)</li> </ul>                                                                                                                                                                                                                                                                                                                                                                                                                                                                                                                                      | No control for confounding                                                                                                     |
| Ho et al, 2004 (33)     | Prospective cohort   | Singapore; 1 hospital; 18 March-29 April 2003                   | <p>372 HCWs</p> <ul style="list-style-type: none"> <li>Mean age, 34.2 y</li> <li>77% female</li> <li>27.7% physician, 55.1% nurse, 17.2% allied health and clerical</li> <li>2.2% (8/372) seropositive for SARS-CoV-1; 6 met criteria for SARS-1</li> </ul>                                                                             | <p>RR (95% CI) for SARS-CoV-1 seropositivity</p> <ul style="list-style-type: none"> <li>Exposure only vs. direct contact: 2.40 (0.64-9.00)</li> <li>Protected direct contact vs. unprotected direct contact: 0.16 (0.03-1.02)</li> <li>Use of full PPE 100% of the time vs. &lt;100% of the time: 0.19 (0.02-1.49)</li> </ul>                                                                                                                                                                                                                                                                                                                                                                                                                                                              | No control for confounding; few cases with imprecise estimates                                                                 |
| Ip et al, 2004 (34)     | Retrospective cohort | Hong Kong; 1 hospital; blood samples obtained after 21 May 2003 | <p>742 HCWs</p> <ul style="list-style-type: none"> <li>Mean age, 36.2 y (HCWs with serologic testing)</li> <li>79% female (HCWs with serologic testing)</li> <li>9.0% doctor, 3% nurse, 23% allied health, 14% health care/general service assistant, 13% ancillary, 3.7% other</li> <li>7.1% (53/742) diagnosed with SARS-1</li> </ul> | <p>Incidence of SARS-1</p> <ul style="list-style-type: none"> <li>Doctors: 2.4% (2/85)</li> <li>Nurses: 11.6% (38/328)</li> <li>Allied health: 0.9% (1/114)</li> <li>Health care/general service assistants: 11.8% (12/102)</li> <li>Ancillary: 0% (0/113)</li> <li>Other: 0% (0/12)</li> </ul>                                                                                                                                                                                                                                                                                                                                                                                                                                                                                            | No control for confounding                                                                                                     |
| Jiang et al, 2003 (35)  | Retrospective cohort | China (Guangzhou); 1 hospital; 30 January-30 March 2003         | <p>431 HCWs</p> <ul style="list-style-type: none"> <li>Age, sex, role/type of HCW not reported</li> <li>17.9% (77/431) diagnosed with SARS-1</li> </ul>                                                                                                                                                                                 | <p>Incidence of SARS-1</p> <ul style="list-style-type: none"> <li>Ward A (no ventilation window, room volume 61.9 m<sup>2</sup>, 1 SARS-1 patient, total time of hospitalization 43 h): 73.2% (52/71)</li> <li>Ward B (no ventilation window, room volume 85.1 m<sup>2</sup>, 1 SARS-1 patient, total time of hospitalization 168 h): 32.1% (9/28)</li> <li>Ward C (ventilation window 1.1 m<sup>2</sup>, room volume 104.3 m<sup>2</sup>, 1 SARS-1 patient, total time of hospitalization 110 h): 27.5% (11/40)</li> <li>Ward D (ventilation windows 1.9 m<sup>2</sup>, room volume 74.0 m<sup>2</sup>, 96 SARS-1 patients, total time of hospitalization 1272 h): 1.7% (5/292)</li> </ul>                                                                                                | No control for confounding; too few wards to determine effects of ventilation and patient variables on risk for SARS-1 in HCWs |
| Lau et al, 2004 (43)    | Retrospective cohort | Hong Kong; 16 hospitals; 4 March-31 May 2003                    | <p>~28 000 HCWs</p> <p>Age, sex, and HCW role/position not reported</p> <p>1.2% (339) diagnosed with SARS-1</p>                                                                                                                                                                                                                         | <p>Mean attack rate (SD) for SARS-1 across 16 hospitals: overall: 1.06% (SD 1.31)</p> <ul style="list-style-type: none"> <li>Nurse: 1.07% (SD 1.38)</li> <li>Nonmedical support staff: 2.34% (SD 3.43)</li> </ul>                                                                                                                                                                                                                                                                                                                                                                                                                                                                                                                                                                          | No control for confounding; SARS-1 criteria not reported                                                                       |

|                            |                      |                                                                   |                                                                                                                                                                                                                                                                                                                                                                                                                                                                                  |                                                                                                                                                                                                                                                                                                                                                                                                                                                                                                                                                                                                                                                                                                                                                                                                                                                                                                                                                                                                                                                                                                                                                                                                                                                                                                                                                                                                                                                                                                                                                                                                                          |                                                                                                                      |
|----------------------------|----------------------|-------------------------------------------------------------------|----------------------------------------------------------------------------------------------------------------------------------------------------------------------------------------------------------------------------------------------------------------------------------------------------------------------------------------------------------------------------------------------------------------------------------------------------------------------------------|--------------------------------------------------------------------------------------------------------------------------------------------------------------------------------------------------------------------------------------------------------------------------------------------------------------------------------------------------------------------------------------------------------------------------------------------------------------------------------------------------------------------------------------------------------------------------------------------------------------------------------------------------------------------------------------------------------------------------------------------------------------------------------------------------------------------------------------------------------------------------------------------------------------------------------------------------------------------------------------------------------------------------------------------------------------------------------------------------------------------------------------------------------------------------------------------------------------------------------------------------------------------------------------------------------------------------------------------------------------------------------------------------------------------------------------------------------------------------------------------------------------------------------------------------------------------------------------------------------------------------|----------------------------------------------------------------------------------------------------------------------|
| Li et al, 2003 (45)        | Retrospective cohort | China (Beijing); 1 hospital; 24 March-13 May 2003                 | 770 HCWs <ul style="list-style-type: none"> <li>Age, sex and HCW role/position not reported</li> <li>2.43% (18/770) diagnosed with SARS-1</li> </ul>                                                                                                                                                                                                                                                                                                                             | <ul style="list-style-type: none"> <li>Other technical and medical staff: 0.32% (SD 0.49); <b>P = 0.035</b> for job category</li> </ul> Incidence of SARS-1 <ul style="list-style-type: none"> <li>Doctor: 2.88%</li> <li>Nurse: 4.78%</li> <li>Nursing assistant: 6.67%</li> <li>Other hospital staff: 0%</li> </ul>                                                                                                                                                                                                                                                                                                                                                                                                                                                                                                                                                                                                                                                                                                                                                                                                                                                                                                                                                                                                                                                                                                                                                                                                                                                                                                    | No control for confounding; few SARS-1 cases; number of HCWs in different roles/positions not reported               |
| Loeb et al, 2004 (50)      | Retrospective cohort | Canada (Toronto); 1 hospital critical care units; 8-16 March 2003 | 43 nurses <ul style="list-style-type: none"> <li>Mean age, 41 y</li> <li>100% female</li> <li>18.6% (8/50) diagnosed with SARS-1</li> </ul>                                                                                                                                                                                                                                                                                                                                      | Unadjusted RR (95% CI) for SARS-1 <ul style="list-style-type: none"> <li>Gown vs. inconsistent gown: 0.36 (0.10-1.24)</li> <li>Gloves vs. inconsistent gloves: 0.45 (0.14-1.46)</li> <li>Consistent N95 or surgical mask vs. inconsistent mask: <b>0.23 (0.07-0.78)</b></li> <li>Consistent N95 vs. inconsistent mask: <b>0.22 (0.05-0.93)</b></li> <li>Surgical mask vs. no mask: 0.45 (0.07-2.71)</li> <li>N95 vs. surgical mask: 0.50 (0.06-4.23)</li> <li>Intubation (yes vs. no): <b>4.20 (1.58-11.14)</b></li> <li>Suctioning before intubation (yes vs. no): <b>4.20 (1.58-11.14)</b></li> <li>Suctioning after intubation (yes vs. no): 0.68 (0.21-2.26)</li> <li>Nebulizer treatment (yes vs. no): <b>3.24 (1.11-9.42)</b></li> <li>Manipulation of oxygen mask (yes vs. no): 9.00 (1.00-64.89)</li> <li>Manual ventilation (yes vs. no): 1.19 (0.30-4.65)</li> <li>Manipulation of BiPAP mask (yes vs. no): 2.60 (0.8-7.99)</li> <li>Performing an ECG (yes vs. no): 1.67 (0.51-5.46)</li> <li>Endotracheal aspirate (yes vs. no): 1.00 (0.29-3.45)</li> <li>Bronchoscopy (yes vs. no): 2.14 (0.46-9.90)</li> <li>No significant associations: Mouth or dental care, insertion of nasogastric tube, insertion indwelling catheter, insertion of peripheral intravenous catheter, insertion of central venous catheter, bathing or patient transfer, administration of medication, venipuncture, manipulation of commodes or bedpans, feeding, chest physiotherapy, assessment of patient, insertion of peripheral intravenous line, radiology procedures, dressing change, urine specimen collected</li> </ul> | Potential recall bias; no control for confounding                                                                    |
| Nishiyama et al, 2008 (57) | Retrospective cohort | Vietnam (Hanoi); 2 hospitals; exposure 3-17 March 2003            | 85 HCWs <ul style="list-style-type: none"> <li>Age, sex, and HCW role/position not reported</li> <li>Proportion diagnosed with SARS-1 unclear (29% of 146 HCWs potentially exposed diagnosed with SARS-1 and 40% seropositive for SARS-CoV-1, but analysis evaluated a subgroup of 85 HCWs)</li> </ul>                                                                                                                                                                           | Unadjusted estimates not reported<br>Adjusted OR (95% CI) for SARS-1 (factors included in model) <ul style="list-style-type: none"> <li>Age: 0.97 (0.90-1.03)</li> <li>Patient required oxygen vs. no oxygen: 2.65 (0.66-10.7)</li> <li>Mask use: <ul style="list-style-type: none"> <li>Sometimes vs. always: <b>2.90 (0.73-11.6)</b></li> <li>No vs. always: <b>12.6 (2.00-80.0)</b></li> </ul> </li> <li>Handwashing before patient contact: <ul style="list-style-type: none"> <li>Sometimes vs. always: 1.25 (0.25-6.10)</li> <li>No vs. always: 3.69 (0.56-24.2)</li> </ul> </li> <li>Doctor vs. other staff: <b>40.9 (2.65-630)</b></li> <li>Nurse vs. other staff: <b>57.3 (5.28-621)</b></li> <li>Indirect contact with SARS patient vs. direct contact: 6.06 (0.63-58.7)</li> <li>No attendance at lecture on nosocomial infection vs. attendance: 5.49 (0.90-33.4)</li> </ul>                                                                                                                                                                                                                                                                                                                                                                                                                                                                                                                                                                                                                                                                                                                                 | Potential recall bias; potential selection bias; some estimates very imprecise                                       |
| Raboud et al, 2010 (60)    | Retrospective cohort | Canada (Toronto); 20 hospitals; 5 March-12 June 2003              | 624 HCWs who provided care to intubated SARS-1 patients <ul style="list-style-type: none"> <li>Mean age, 38.5 y (cases)</li> <li>75.2% female</li> <li>12.3% staff physician, 2.6% medical resident/intern, 45.4% registered nurse, 14.3% respiratory therapist, 10.7% radiology technologist, 6.1% housekeeper, 4.2% personal service assistant, 2.2% laboratory technician/technologist, 0.5% EMT; 1.8% other</li> <li>4.2% (26/624) with SARS-CoV-1 seropositivity</li> </ul> | Prevalence of SARS-CoV-1 seropositivity <ul style="list-style-type: none"> <li>Physicians: 5.2% (4/77)</li> <li>Medical resident/intern: 12.5% (2/16)</li> <li>Registered nurse: 3.9% (11/283)</li> <li>Respiratory therapist: 4.5% (4/89)</li> <li>Radiology technologist: 1.5% (1/67)</li> <li>Personal services assistant: 3.8% (1/25)</li> <li>Paramedic/EMT: 100% (3/3)</li> </ul> Unadjusted OR (95% CI) for SARS-1 seropositivity (unit of analysis HCWs)† <ul style="list-style-type: none"> <li>Chronic illness (yes vs. no): 0.62 (0.08-4.74)</li> <li>Always wore goggles in patient room (yes vs. no): <b>0.33 (0.15-</b></li> </ul>                                                                                                                                                                                                                                                                                                                                                                                                                                                                                                                                                                                                                                                                                                                                                                                                                                                                                                                                                                         | Potential recall bias; SARS-1 diagnosis did not require laboratory confirmation; collinearity in model not addressed |

- **0.72)**
- Always wore gloves in patient room (yes vs. no): 0.59 (0.17-2.06)
- Always wore gown in patient room (yes vs. no): **0.35 (0.14-0.91)**
- Surgical mask in patient room vs. no mask (reference): 3.27 (0.72-14.79)
  - N95 or equivalent: 0.59 (0.17-2.08)
  - Higher protection than N95: 0.25 (0.01-4.98)
- N95 or N95 equivalent in patient room vs. surgical mask: **0.18 (0.06-0.53)**
- Hand hygiene after removal of face protection vs. no hand hygiene (reference): 0.48 (0.19-1.22)
  - Hand hygiene before removing face protection, with or without hand hygiene after: 0.93 (0.29-3.01)
- Infection control training (no vs. yes): **3.93 (1.75-8.83)**
- Noninvasive ventilation (yes vs. no): **3.15 (1.39-7.15)**
- High-flow oxygen (yes vs. no): 0.39 (0.09-1.66)
- Mechanical ventilation (yes vs. no): 0.87 (0.38-1.97)
- Present during intubation (yes vs. no): **3.03 (1.37-6.70)**
- Present during suctioning before intubation (yes vs. no): 1.71 (0.70-4.17)
- Present during suctioning after intubation (yes vs. no): 1.79 (0.79-4.02)
- Present during manual ventilation before intubation (yes vs. no): **2.84 (1.25-6.42)**
- Present during manual ventilation after intubation (yes vs. no): 1.27 (0.50-3.24)
- Cardiac compressions (yes vs. no): 2.95 (0.36-24.50)
- Sputum sample collection (yes vs. no): 2.68 (0.88-8.17)
- Nebulizer treatment (yes vs. no): 1.17 (0.07-20.66)
- Manipulation of oxygen mask (yes vs. no): 2.15 (0.94-4.89)
- Insertion of nasogastric tube (yes vs. no): 1.02 (0.23-4.47)
- Present during ECG (yes vs. no): **3.74 (1.67-8.39)**
- HCW underlying chronic illness (yes vs. no): 0.94 (0.24-3.59)
- Number of times entering patient's room, based on number of shifts with exposure (reference, >10 times):
  - 1-2 times: 0.67 (0.28-1.63)
  - 3-5 times: 0.69 (0.39-1.23)
  - 6-10 times: 0.41 (0.14-1.20)
- Duration of face-to-face contact with patient, based on number of shifts with exposure (reference, >4 h)
  - <1 min: 0.83 (0.11-6.27)
  - 1-10 min: 0.98 (0.26-3.71)
  - 11-30 min: 1.33 (0.20-8.88)
  - 31-60 min: 2.73 (0.33-22.5)
  - 1-4 h: 2.37 (0.41-13.6)
- Always wore recommended PPE, based on number of shifts with exposure (yes vs. no): 0.70 (0.19-2.58)
- PPE removal, based on number of shifts with exposure (yes vs. no)
  - No hand hygiene described: 0.87 (0.16-6.45)
  - Hand hygiene performed once: 0.67 (0.11-3.99)
  - Adequate PPE removal: 1.18 (0.20-6.83)
- Not statistically significant in univariate analyses: patient recognized as SARS case, FiO<sub>2</sub> on day 2 of hospital admission, bronchoscopy, chest physiotherapy, defibrillation, collection of stool sample, emptying urine bag or taking urine sample, emptying bed pan, insert central venous line, insert urinary catheter, insert peripheral intravenous access line, venipuncture/arterial blood gas, chest tube insertion, bathing, feeding, transporting, taking oral temperature, administering oral medication, or housekeeping activities

Adjusted OR (95% CI) for SARS-1 (factors retained in model)

|                               |                      |                                                                                    |                                                                                                                                                                                                                                                                                                                                                                                                                                                |                                                                                                                                                                                                                                                                                                                                                                                                                                                                                                                                                                                                                                                                                                                                                                                                                                                                                                                                                                                                                                                                                          |                                                                                                                                                                                                                                                   |
|-------------------------------|----------------------|------------------------------------------------------------------------------------|------------------------------------------------------------------------------------------------------------------------------------------------------------------------------------------------------------------------------------------------------------------------------------------------------------------------------------------------------------------------------------------------------------------------------------------------|------------------------------------------------------------------------------------------------------------------------------------------------------------------------------------------------------------------------------------------------------------------------------------------------------------------------------------------------------------------------------------------------------------------------------------------------------------------------------------------------------------------------------------------------------------------------------------------------------------------------------------------------------------------------------------------------------------------------------------------------------------------------------------------------------------------------------------------------------------------------------------------------------------------------------------------------------------------------------------------------------------------------------------------------------------------------------------------|---------------------------------------------------------------------------------------------------------------------------------------------------------------------------------------------------------------------------------------------------|
|                               |                      |                                                                                    |                                                                                                                                                                                                                                                                                                                                                                                                                                                | <ul style="list-style-type: none"> <li>• HCWs eye/mucous membranes exposed to body fluids: <b>7.34 (2.19-24.52)</b></li> <li>• Patient APACHE II score <math>\geq 20</math>: <b>17.05 (3.20-90.75)</b></li> <li>• Present during ECG: <b>3.52 (1.58-7.86)</b></li> <li>• Present during intubation: <b>2.79 (1.40-5.58)</b></li> <li>• Patient PaO<sub>2</sub>-FiO<sub>2</sub> ratio <math>\leq 59</math>: <b>8.65 (2.31-32.36)</b></li> </ul>                                                                                                                                                                                                                                                                                                                                                                                                                                                                                                                                                                                                                                           |                                                                                                                                                                                                                                                   |
| Scales et al, 2003 (64)       | Retrospective cohort | Canada (Toronto); 1 hospital intensive care unit; exposure occurred; 23 March 2003 | <p>69 HCWs with brief, unexpected exposure to SARS-1-infected patient</p> <ul style="list-style-type: none"> <li>• Age, sex, HCW role/position not reported</li> <li>• 10.1% (7/69) diagnosed with SARS-1</li> </ul>                                                                                                                                                                                                                           | <p>Incidence of SARS-1</p> <ul style="list-style-type: none"> <li>• Entry into room: 19% (6/31)</li> <li>• Contact duration <math>\leq 10</math> min: 0% (0/11) <ul style="list-style-type: none"> <li>◦ 11-30 min: 12.5% (1/8)</li> <li>◦ 31 min to 4 h: 25% (2/8)</li> <li>◦ <math>\geq 4</math> h: 75% (3/4)</li> </ul> </li> <li>• Nature of contact: touched patient: 32% (6/19)</li> <li>• Contact with mucous membranes: 40% (4/10)</li> <li>• Procedure involving contact with mucous membranes or respiratory secretions: 40% (6/15)</li> <li>• Present during noninvasive positive-pressure ventilation: 18% (4/22)</li> <li>• Performed or assisted intubation: 60% (3/5)</li> <li>• Always wore: <ul style="list-style-type: none"> <li>◦ Gloves: 20% (3/15)</li> <li>◦ Gown and gloves: 20% (3/15)</li> <li>◦ Any mask (N95 or surgical): 23% (3/13)</li> <li>◦ Gown, gloves, and N95 mask: 17% (1/6)</li> <li>◦ Gown, gloves, and surgical mask: 33% (2/6)</li> <li>◦ Gown, gloves, and any mask: 25% (3/12)</li> <li>◦ No precautions: 12.5% (1/8)</li> </ul> </li> </ul> | Potential recall bias; no control for confounding; few cases                                                                                                                                                                                      |
| Wang et al, 2007 (69)         | Retrospective cohort | Taiwan; 4 hospitals; study began 1 July 2003                                       | <p>2512 HCWs</p> <ul style="list-style-type: none"> <li>• Mean age, 33.4 y</li> <li>• 88% female</li> <li>• 13% physician, 83% nurse</li> <li>• 0.36% (9/2512) seropositive for SARS-CoV-1; 1.0% (9/882) among those reporting contact with SARS-1 patients</li> </ul>                                                                                                                                                                         | <p>Unadjusted RR (95% CI) for SARS-CoV-1 seropositivity</p> <ul style="list-style-type: none"> <li>• All HCWs (n = 2197) <ul style="list-style-type: none"> <li>◦ Female vs. male: 1.10 (0.14-8.74)</li> <li>◦ Nurse vs. physician: 1.21 (0.15-9.61)</li> <li>◦ ED vs. ward: <b>25.94 (7.07-95.14)</b></li> </ul> </li> <li>• HCWs with contact with suspected or possible SARS cases (n = 882) <ul style="list-style-type: none"> <li>◦ Female vs. male: 1.00 (0.13-7.91)</li> <li>◦ Nurse vs. physician: 0.92 (0.12-7.28)</li> <li>◦ ED vs. ward: <b>9.45 (2.58-34.64)</b></li> </ul> </li> </ul>                                                                                                                                                                                                                                                                                                                                                                                                                                                                                      | Potential recall bias; no control for confounding; imprecise estimates                                                                                                                                                                            |
| Wilder-Smith et al, 2005 (72) | Retrospective cohort | Singapore; 1 hospital; March 2003                                                  | <p>98 HCWs (80 with serologic testing)</p> <ul style="list-style-type: none"> <li>• Median age, 28 y</li> <li>• 91% female</li> <li>• 10% doctor, 77.5%, 12.5% other</li> <li>• 45.9% (45/98) with SARS-CoV-1 infection (37 cases pneumonia, 2 cases subclinical, and 6 cases asymptomatic)</li> </ul>                                                                                                                                         | <p><b>Unadjusted OR (95% CI) for SARS-CoV-1 infection†</b></p> <ul style="list-style-type: none"> <li>• Female vs. male: 0.47 (0.10-2.07)</li> <li>• Mask use vs. no mask use: <b>0.25 (0.09-0.69)</b></li> <li>• Glove use vs. no glove use: <b>0.40 (0.17-0.96)</b></li> <li>• Handwashing vs. no handwashing: 0.35 (0.11-1.12)</li> <li>• Close contact with SARS-1 patient (yes vs. no): 1.11 (0.23-5.26)</li> </ul> <p>Mean age: <b>29.2 y in cases vs. 33.7 in controls; P = 0.04</b></p> <p>Unadjusted RR (95% CI) for SARS-1</p> <ul style="list-style-type: none"> <li>• Definitely visited patient's cubicle vs. did not: <b>7.4 (1.0-53.5)</b></li> <li>• Association between distance from patient and likelihood of infection being present</li> </ul>                                                                                                                                                                                                                                                                                                                      | Potential recall bias, no control for confounders; analyses appear to exclude 2 patients with subclinical SARS-1                                                                                                                                  |
| Wong et al, 2004 (75)         | Retrospective cohort | Hong Kong; 1 hospital; 4-10 March 2003                                             | <p>66 medical students</p> <ul style="list-style-type: none"> <li>• Mean age, 22.3 y (cases)</li> <li>• 50% female (cases)</li> <li>• 24% (16/66) diagnosed with SARS-1</li> </ul>                                                                                                                                                                                                                                                             | <p>Unadjusted RR (95% CI) for SARS-1</p> <ul style="list-style-type: none"> <li>• Definitely visited patient's cubicle vs. did not: <b>7.4 (1.0-53.5)</b></li> <li>• Association between distance from patient and likelihood of infection being present</li> </ul>                                                                                                                                                                                                                                                                                                                                                                                                                                                                                                                                                                                                                                                                                                                                                                                                                      | Potential recall bias; no control for confounding                                                                                                                                                                                                 |
| Yen et al, 2006 (77)          | Retrospective cohort | Taiwan; 87 hospitals; 27 April 27-21 May 2003                                      | <p>87 hospitals</p> <ul style="list-style-type: none"> <li>• Study hospital: <ul style="list-style-type: none"> <li>◦ Integrated infection control strategy involving triaging patients and use of physical barriers, separation of hospital space into zones of risk, and extensive installation of alcohol dispensers for glove-on hand rubbing</li> </ul> </li> <li>• 2 HCWs diagnosed with SARS-1</li> <li>• Control hospitals:</li> </ul> | <p>Incidence of SARS-1 in HCWs</p> <ul style="list-style-type: none"> <li>• Study hospital vs. control hospitals: <b>0.03 case/bed vs. 0.13 case/bed, P = 0.03</b></li> </ul>                                                                                                                                                                                                                                                                                                                                                                                                                                                                                                                                                                                                                                                                                                                                                                                                                                                                                                            | No control for confounding; no description of infection control measures in control hospitals; criteria for SARS-1 diagnosis in control hospitals unclear; only 2 cases in study hospital; analyzed as cases per hospital bed rather than per HCW |

|                       |              |                                                              |                                                                                                                                                                                                                                                                                                                    |                                                                                                                                                                                                                                                                                                                                                                                                                                                                                                                                                                                                                                                                                                                                                                                                                                                                                                                                                                                                                                                                                                                                                                                                                                                                                                                                                                                                                                                                                                                                                                                                                                                                                                                                                                                                                                                                                                                                                                                                                                                                                                                                                                                                                                                                                                                                                                                                                                                                                                                                                                                                                                                                                                                                                                                                                                                                                                                                                                                                                                                                                                                                                                                                                                                                                                                                                                                                                              |                                                                                                    |
|-----------------------|--------------|--------------------------------------------------------------|--------------------------------------------------------------------------------------------------------------------------------------------------------------------------------------------------------------------------------------------------------------------------------------------------------------------|------------------------------------------------------------------------------------------------------------------------------------------------------------------------------------------------------------------------------------------------------------------------------------------------------------------------------------------------------------------------------------------------------------------------------------------------------------------------------------------------------------------------------------------------------------------------------------------------------------------------------------------------------------------------------------------------------------------------------------------------------------------------------------------------------------------------------------------------------------------------------------------------------------------------------------------------------------------------------------------------------------------------------------------------------------------------------------------------------------------------------------------------------------------------------------------------------------------------------------------------------------------------------------------------------------------------------------------------------------------------------------------------------------------------------------------------------------------------------------------------------------------------------------------------------------------------------------------------------------------------------------------------------------------------------------------------------------------------------------------------------------------------------------------------------------------------------------------------------------------------------------------------------------------------------------------------------------------------------------------------------------------------------------------------------------------------------------------------------------------------------------------------------------------------------------------------------------------------------------------------------------------------------------------------------------------------------------------------------------------------------------------------------------------------------------------------------------------------------------------------------------------------------------------------------------------------------------------------------------------------------------------------------------------------------------------------------------------------------------------------------------------------------------------------------------------------------------------------------------------------------------------------------------------------------------------------------------------------------------------------------------------------------------------------------------------------------------------------------------------------------------------------------------------------------------------------------------------------------------------------------------------------------------------------------------------------------------------------------------------------------------------------------------------------------|----------------------------------------------------------------------------------------------------|
|                       |              |                                                              | <ul style="list-style-type: none"> <li>○ No intervention</li> <li>○ 93 HCWs diagnosed with SARS-1</li> </ul>                                                                                                                                                                                                       |                                                                                                                                                                                                                                                                                                                                                                                                                                                                                                                                                                                                                                                                                                                                                                                                                                                                                                                                                                                                                                                                                                                                                                                                                                                                                                                                                                                                                                                                                                                                                                                                                                                                                                                                                                                                                                                                                                                                                                                                                                                                                                                                                                                                                                                                                                                                                                                                                                                                                                                                                                                                                                                                                                                                                                                                                                                                                                                                                                                                                                                                                                                                                                                                                                                                                                                                                                                                                              |                                                                                                    |
| Chen et al, 2009 (26) | Case-control | China (Guangzhou); 2 hospitals; dates not reported           | <p>91 HCW cases with SARS-CoV-1 seropositivity (80 SARS-1) and 657 controls</p> <ul style="list-style-type: none"> <li>• 34.9% aged &lt;26 y, 54.2% 26-40 y, 10.8% &gt;50 y</li> <li>• 76.0% female</li> <li>• 31.5% doctor, 49.2% nurse, 7.3% health attendant, 5.0% laboratory technician, 7.0% other</li> </ul> | <p>Unadjusted OR (95% CI) for SARS-CoV-1 seropositivity</p> <ul style="list-style-type: none"> <li>• Single vs. double gowns: <b>2.12 (1.36-3.31)</b></li> <li>• Single vs. double cotton masks: <b>2.53 (1.56-4.07)</b></li> <li>• Single vs. double gloves: <b>5.20 (2.65-10.23)</b></li> <li>• Shoe cover never vs. every time (reference): <b>3.80 (2.24-6.45)</b>; sometimes: <b>5.04 (2.04-12.48)</b>; often: 2.29 (0.96-5.67)</li> <li>• Cap never vs. every time (reference): <b>1.79 (1.03-3.10)</b>; sometimes: 0.48 (0.14-1.67); often: 0.59 (0.13-2.65)</li> <li>• Face shield in SARS ward never vs. every time (reference): 4.05 (0.54-30.34); sometimes: 0.22 (0.01-3.56)</li> <li>• Goggles while performing operation for SARS-1 patients never vs. every time (reference): <b>7.83 (1.07-57.63)</b>; sometimes: 0.84 (0.07-9.45)</li> <li>• Wash uncovered skin after caring for SARS-1 patients never vs. every time (reference): <b>3.29 (1.29-8.43)</b>; sometimes: 2.16 (0.77-6.05); often: 1.47 (0.45-4.79)</li> <li>• Wash hands after caring for SARS-1 patients never vs. every time (reference): 0.89 (0.52-1.51); sometimes: 1.03 (0.38-2.75); often: 1.14 (0.64-2.06)</li> <li>• Wash nasal cavity after caring for SARS-1 patients never vs. every time (reference): 3.21 (0.98-10.53); sometimes: 2.51 (0.72-8.77); often: 0.82 (0.13-5.13)</li> <li>• Wash oral cavity after caring for SARS-1 patients, never vs. every time (reference): <b>3.26 (1.15-9.21)</b>; sometimes: 2.05 (0.67-6.33); often: 0.28 (0.03-2.59)</li> <li>• Special training for SARS-1 (no vs. yes): <b>2.44 (1.41-4.23)</b></li> <li>• Performing tracheostomy (yes vs. no): <b>4.15 (1.50-11.50)</b></li> <li>• Performing endotracheal intubations (yes vs. no): <b>8.03 (3.90-16.56)</b></li> <li>• Caring for "super spreading" patient (yes vs. no): <b>4.55 (2.75-7.54)</b></li> <li>• Avoiding face to face while caring for patient, sometimes vs. never (reference): 0.64 (0.36-1.10); often: <b>0.53 (0.31-0.93)</b>; every time: <b>0.16 (0.06-0.46)</b></li> <li>• Air ventilation method in offices and SARS-1 wards, natural vs. artificial central ventilation (reference): <b>0.28 (0.14-0.54)</b>; natural and additional electronic exhaust fan: <b>0.17 (0.06-0.25)</b></li> <li>• Type of equipment for washing hands nonautomatic vs. automatic tap (reference): <b>4.18 (1.66-10.51)</b>; others: 1.09 (0.12-9.74)</li> </ul> <p><b>Adjusted OR (95% CI) for SARS-CoV-1 seropositivity (factors included in forward stepwise model)</b></p> <ul style="list-style-type: none"> <li>• Single vs. double gloves worn: <b>4.13 (1.99-8.55)</b></li> <li>• Caring for "super spreading" patient (yes vs. no): <b>3.57 (1.94-6.57)</b></li> <li>• Avoiding face to face while caring for patient (reference never) <ul style="list-style-type: none"> <li>○ Sometimes: 0.67 (0.36-1.24)</li> <li>○ Often: <b>0.30 (0.10-0.90)</b></li> <li>○ Every time: <b>0.30 (0.15-0.60)</b></li> </ul> </li> <li>• Air ventilation method in offices and SAR wards (reference artificial central ventilation) <ul style="list-style-type: none"> <li>○ Natural ventilation: <b>0.40 (0.18-0.88)</b></li> <li>○ Natural ventilation and additional electronic exhaust fan: <b>0.27 (0.16-0.63)</b></li> </ul> </li> <li>• Performing endotracheal intubation (yes vs. no): <b>2.76 (1.16-6.53)</b></li> </ul> | Potential recall bias; methods for selecting controls unclear; collinearity in model not addressed |
| Lau, 2004 (41)        | Case-control | Hong Kong; 5 hospitals; cases diagnosed 28 March-25 May 2003 | <p>72 HCW cases with SARS-1 and 143 matched controls</p> <ul style="list-style-type: none"> <li>• Mean age and sex not reported</li> <li>• 59.7% nurse, 23.6% health care</li> </ul>                                                                                                                               | <p>Unadjusted matched OR (95% CI) for direct contact with SARS patient, direct patient contact in general, and no patient contact</p> <ul style="list-style-type: none"> <li>• Inconsistent N95 or surgical mask use vs. consistent: 2.00 (0.05-∞), 4.00 (0.21-235.99), 2.43 (0.41-16.77); for all HCWs,</li> </ul>                                                                                                                                                                                                                                                                                                                                                                                                                                                                                                                                                                                                                                                                                                                                                                                                                                                                                                                                                                                                                                                                                                                                                                                                                                                                                                                                                                                                                                                                                                                                                                                                                                                                                                                                                                                                                                                                                                                                                                                                                                                                                                                                                                                                                                                                                                                                                                                                                                                                                                                                                                                                                                                                                                                                                                                                                                                                                                                                                                                                                                                                                                          | Potential recall bias; collinearity in model not addressed                                         |

assistant, 9.7% medical officer,  
2.8% clerical staff, 4.2%  
workmen

- unadjusted unmatched OR, **3.74 (1.06-13.24)†**
- Inconsistent N95 mask use vs. consistent: 2.86 (0.70-13.71), 1.28 (0.16-10.47), 1.83 (0.72-4.71); for all HCWs, unadjusted unmatched OR, **2.08 (1.07-4.02)†**
- Inconsistent goggles use vs. consistent: **6.41 (2.49-19.49)**, **6.93 (2.19-28.85)**, **3.50 (1.42-9.47)**; for all HCWs, unadjusted unmatched OR, **13.82 (6.71-28.45)†**
- Inconsistent glove use vs. consistent: **20.54 (2.96-887.72)**, 3.53 (0.77-21.85), **2.42 (1.05-5.81)**; for all HCWs, unadjusted unmatched OR, **4.54 (2.43-8.47)†**
- Inconsistent gown use vs. consistent: **8.85 (2.46-48.28)**, **11.54 (2.56-106.36)**, **3.42 (1.38-9.30)**; for all HCWs, unadjusted unmatched OR, **8.77 (4.58-16.82)†**
- Inconsistent cap use vs. consistent: **7.30 (2.33-30.21)**, **12.81 (2.92-116.75)**, **4.05 (1.68-10.76)**; for all HCWs, unadjusted unmatched OR, **11.79 (6.03-22.08)†**
- 1-2 PPE items inconsistently used vs. 0 items: **5.35 (1.79-18.53)**, **4.85 (1.01-31.86)**, 1.56 (0.28-7.97); for all HCWs, unadjusted unmatched OR, **3.40 (1.81-6.36)†**
- $\geq 3$  PPE items inconsistently used vs. 0 items: **7.84 (2.30-34.83)**, **10.83 (2.29-102.60)**, **3.40 (1.38-9.23)**; for all HCWs, **unadjusted unmatched OR, 3.96 (2.40-6.52)†**
- Inconsistent hand hygiene vs. consistent: 4.83 (0.38- $\infty$ ), 1.00 (0.02-19.21), **6.38 (1.64-36.17)**

All HCWs, perceived inadequacy of supply (yes vs. no):

- Surgical mask: **28.00 (4.26- $\infty$ )**
- N95 mask: **5.19 (1.95-16.13)**
- Gown: **8.44 (2.77-34.37)**
- Gloves: **29.34 (5.79- $\infty$ )**
- Goggles: **19.81 (4.83-174.55)**
- Cap: **52.41 (9.08- $\infty$ )**
- Any PPE item: **6.78 (2.86-18.51)**
- 1-2 PPE items identified to be inadequate vs. 0 items (reference): **3.25 (1.17-9.80)**; 3 items: **52.24 (7.70-2280.07)**

All HCWs:

- SARS infection control training <2 h vs. none (reference): 0.47 (0.18-1.14);  $\geq 2$  h: **0.03 (0.001-0.20)**
- Understood infection controls measures (yes vs. no): **3.14 (1.35-7.73)**
- Acquired updated information (yes vs. no): 0.27 (0.06-1.04)
- High-risk procedures with SARS patients (yes vs. no): 1.22 (0.45-3.14)
- Direct contact with SARS patients (yes vs. no): 0.57 (0.28-1.14)
- Direct contact with patients in general (yes vs. no): 1.68 (0.07-117.74)
- Seconded from another unit (yes vs. no): 0.60 (0.29-1.21)
- Social contact with SARS patients (yes vs. no): 0.59 (0.28-1.19)
- Frequency of touching N95 mask most of the time/always vs. never/occasional: 1.32 (0.63-2.74)
- General problems with mask (yes vs. no): 0.66 (0.34-1.27)
- Problems with mask fit (yes vs. no): 1.00 (0.51-1.95)
- Problems with fogging of goggles (yes vs. no): 0.61 (0.31-1.17)
- Overall problems in general compliance (yes vs. no): 0.58 (0.25-1.33)
- Number of problems (inconsistent use of  $\geq 1$  PPE item with contact with SARS-1 patient, patients in general, or no patient contact; infection control training <2 h, not understanding infection control procedures, at least 1 PPE item perceived to be in inadequate supply, or inconsistent hand hygiene with no direct patient), 1 vs. 0 (reference): **8.47 (1.37- $\infty$ )**; 2: **17.78 (2.67- $\infty$ )**;  $\geq 3$ : **44.15 (7.02- $\infty$ )**

|                      |              |                                                                                   |                                                                                                                                                                                                                                           |                                                                                                                                                                                                                                                                                                                                                                                                                                                                                                                                                                                                                                                                                                                                                                                                                                                                                                                                                                                                                                                                                                                                                                                                                                                                                                                                                                                                                                                                                                                                                                                                                                                                                                                                                                                                                                                                                                                                                                                                                                                                                                                                                                                                                                                                                                                                                                                                                                                                                                                                                                                                                                                                                                                                                                                                                                                                                                                                                                                                                                                                                                                                                                                                                                                                                                                                                                                                                                                                                                                                                                                                                                                                                                                                                                                                                                                                                                                                           |                                                                                                                  |
|----------------------|--------------|-----------------------------------------------------------------------------------|-------------------------------------------------------------------------------------------------------------------------------------------------------------------------------------------------------------------------------------------|-------------------------------------------------------------------------------------------------------------------------------------------------------------------------------------------------------------------------------------------------------------------------------------------------------------------------------------------------------------------------------------------------------------------------------------------------------------------------------------------------------------------------------------------------------------------------------------------------------------------------------------------------------------------------------------------------------------------------------------------------------------------------------------------------------------------------------------------------------------------------------------------------------------------------------------------------------------------------------------------------------------------------------------------------------------------------------------------------------------------------------------------------------------------------------------------------------------------------------------------------------------------------------------------------------------------------------------------------------------------------------------------------------------------------------------------------------------------------------------------------------------------------------------------------------------------------------------------------------------------------------------------------------------------------------------------------------------------------------------------------------------------------------------------------------------------------------------------------------------------------------------------------------------------------------------------------------------------------------------------------------------------------------------------------------------------------------------------------------------------------------------------------------------------------------------------------------------------------------------------------------------------------------------------------------------------------------------------------------------------------------------------------------------------------------------------------------------------------------------------------------------------------------------------------------------------------------------------------------------------------------------------------------------------------------------------------------------------------------------------------------------------------------------------------------------------------------------------------------------------------------------------------------------------------------------------------------------------------------------------------------------------------------------------------------------------------------------------------------------------------------------------------------------------------------------------------------------------------------------------------------------------------------------------------------------------------------------------------------------------------------------------------------------------------------------------------------------------------------------------------------------------------------------------------------------------------------------------------------------------------------------------------------------------------------------------------------------------------------------------------------------------------------------------------------------------------------------------------------------------------------------------------------------------------------------------|------------------------------------------------------------------------------------------------------------------|
| Liu et al, 2009 (49) | Case-control | China (Beijing); single hospital; cases diagnosed between 5 March and 17 May 2003 | <p>51 HCW cases with SARS-1 and 426 controls</p> <ul style="list-style-type: none"> <li>• Mean age, 29.5 y (cases)</li> <li>• 68.6% female (cases)</li> <li>• 31.4% medical staff, 49.0% nursing staff, 19.6% other occupation</li> </ul> | <p><b>Adjusted matched OR (95% CI) for SARS-1 (factors included in forward stepwise model)</b></p> <ul style="list-style-type: none"> <li>• Perceived inadequacy of PPE vs. no perceived inadequacy: <b>4.27 (1.66-12.54)</b></li> <li>• SARS infections control training &lt;2 h or no training vs. ≥2 h: <b>13.6 (1.24-27.50)</b></li> <li>• Inconsistent use of &gt;1 type of PPE when having direct contact with SARS patients: <b>5.06 (1.91-598.92)</b></li> </ul> <p>Unadjusted OR (95% CI) for SARS-1 (yes vs. no)†</p> <ul style="list-style-type: none"> <li>• 12-layer cotton surgical mask: 0.50 (0.23-1.10)</li> <li>• 16-layer cotton surgical mask: <b>0.27 (0.14-0.51)</b></li> <li>• N95 mask: 0.52 (0.12-2.24)</li> <li>• Disposable mask: 1.12 (0.55-2.27)</li> <li>• Glasses: <b>0.43 (0.23-0.81)</b></li> <li>• Multiple layers of protective clothes: <b>0.44 (0.20-0.99)</b></li> <li>• Gloves: <b>0.16 (0.05-0.57)</b></li> <li>• Goggles: 0.54 (0.29-1.00)</li> <li>• Performing nose wash: <b>0.28 (0.13-0.60)</b></li> <li>• Taking training: <b>0.24 (0.12-0.48)</b></li> <li>• N95 vs. 12- or 16-layer cotton surgical mask: 1.05 (0.24-4.66)</li> <li>• N95 vs. disposable mask: 0.49 (0.10-2.35)</li> <li>• Disposable vs. 12- or 16-layer cotton surgical mask: 2.13 (1.00-4.54)</li> </ul> <p><b>Incidence of SARS-1 (yes vs. no)</b></p> <ul style="list-style-type: none"> <li>• Contact: <ul style="list-style-type: none"> <li>○ Nursing: 10.6% vs. 10.8%, <math>P = 0.96</math></li> <li>○ Physical contact: 11.3% vs. 10.3%, <math>P = 0.75</math></li> <li>○ Injection: 10.8% vs. 11.4%, <math>P = 0.82</math></li> <li>○ Intubation: <b>50.0% vs. 9.7%, <math>P &lt; 0.001</math></b></li> <li>○ Chest compression: <b>33.3% vs. 11.1%, <math>P = 0.02</math></b></li> <li>○ Respiratory secretion: <b>18.3% vs. 9.0%, <math>P = 0.004</math></b></li> <li>○ Sputum: <b>18.0% vs. 8.2%, <math>P = 0.004</math></b></li> <li>○ Feces: 12.7% vs. 10.1%, <math>P = 0.45</math></li> <li>○ Urine: 11.8% vs. 10.4%, <math>P = 0.66</math></li> <li>○ Pulmonary lavage: 0% vs. 11.9%, <math>P = 1.0</math></li> <li>○ Equipment: 13.0% vs. 10.6%, <math>P = 0.83</math></li> <li>○ Pathologic specimens: <b>37.5% vs. 10.2%, <math>P = 0.04</math></b></li> <li>○ Deceased: <b>27.8% vs. 10.0%, <math>P = 0.04</math></b></li> <li>○ Medical waste: 11.5% vs. 10.4%, <math>P = 0.75</math></li> </ul> </li> <li>• Emergency care experience: <b>21.1% vs. 8.4%, <math>P = 0.001</math></b></li> <li>• 1 layer of masks: <b>27.3% vs. 14.8%; <math>P = 0.002</math></b> for number of layers</li> <li>• Multiple layers of masks: 7.0% vs. 14.8%</li> <li>• Taking prophylactic medication: <b>8.6% vs. 20.2%, <math>P = 0.003</math></b></li> <li>• No change in sleeping hours per day: 11.3% vs. 11.4%, <math>P = 0.12</math> for total numbers of sleeping hours</li> <li>• Increase in sleeping hours per day: 7.7% vs. 11.4%</li> </ul> <p>Adjusted OR (95% CI) for SARS-1 (factors included in forward stepwise model)</p> <ul style="list-style-type: none"> <li>• 16-layer cotton surgical mask (no vs. yes): <b>6.04 (2.43-15.00)</b></li> <li>• 12-layer cotton surgical mask (no vs. yes): <b>4.54 (1.62-12.74)</b></li> <li>• Emergency care experience (yes vs. no): <b>2.97 (1.26-6.96)</b></li> <li>• Nose wash (no vs. yes): 2.41 (0.98-5.93)</li> <li>• Respiratory secretion contact (yes vs. no): <b>3.27 (1.41-7.57)</b></li> <li>• Not taking prophylactic medicine vs. taking: <b>2.77 (1.10-6.98)</b></li> <li>• Not taking training vs. taking: <b>2.40 (1.08-5.31)</b></li> <li>• Multiple layers of masks (no vs. yes): <b>2.44 (1.03-5.77)</b></li> <li>• Contact: chest compression (yes vs. no): <b>4.52 (1.08-18.81)</b></li> <li>• Contact with sputum was excluded from the model owing to a high correlation with respiratory secretions; 12-layer and 16-</li> </ul> | Potential recall bias; controls not matched, other than meeting WHO criteria for close contact with SARS patient |
|----------------------|--------------|-----------------------------------------------------------------------------------|-------------------------------------------------------------------------------------------------------------------------------------------------------------------------------------------------------------------------------------------|-------------------------------------------------------------------------------------------------------------------------------------------------------------------------------------------------------------------------------------------------------------------------------------------------------------------------------------------------------------------------------------------------------------------------------------------------------------------------------------------------------------------------------------------------------------------------------------------------------------------------------------------------------------------------------------------------------------------------------------------------------------------------------------------------------------------------------------------------------------------------------------------------------------------------------------------------------------------------------------------------------------------------------------------------------------------------------------------------------------------------------------------------------------------------------------------------------------------------------------------------------------------------------------------------------------------------------------------------------------------------------------------------------------------------------------------------------------------------------------------------------------------------------------------------------------------------------------------------------------------------------------------------------------------------------------------------------------------------------------------------------------------------------------------------------------------------------------------------------------------------------------------------------------------------------------------------------------------------------------------------------------------------------------------------------------------------------------------------------------------------------------------------------------------------------------------------------------------------------------------------------------------------------------------------------------------------------------------------------------------------------------------------------------------------------------------------------------------------------------------------------------------------------------------------------------------------------------------------------------------------------------------------------------------------------------------------------------------------------------------------------------------------------------------------------------------------------------------------------------------------------------------------------------------------------------------------------------------------------------------------------------------------------------------------------------------------------------------------------------------------------------------------------------------------------------------------------------------------------------------------------------------------------------------------------------------------------------------------------------------------------------------------------------------------------------------------------------------------------------------------------------------------------------------------------------------------------------------------------------------------------------------------------------------------------------------------------------------------------------------------------------------------------------------------------------------------------------------------------------------------------------------------------------------------------------------|------------------------------------------------------------------------------------------------------------------|



|                           |              |                                                               |                                                                                                                                                                                                                                                    |                                                                                                                                                                                                                                                                                                                                                                                                                                                                                                                                                                                                                                                                                                                                                                                                                                                                                                                                                                                                                                                                                                                                                                                                                                                                                                                                                                                                                                                                                                                                                                                                                                                                                                                                                                                                                                                                                                                                                                                                                                                                                                                                                                                                                                                                                                                                                                                                                                                                                                                                                                                                                                                                                                                                                                                                                                                                                                                                                                                                                                                                                                                                                                                                                                                               |                                                                                                                                |
|---------------------------|--------------|---------------------------------------------------------------|----------------------------------------------------------------------------------------------------------------------------------------------------------------------------------------------------------------------------------------------------|---------------------------------------------------------------------------------------------------------------------------------------------------------------------------------------------------------------------------------------------------------------------------------------------------------------------------------------------------------------------------------------------------------------------------------------------------------------------------------------------------------------------------------------------------------------------------------------------------------------------------------------------------------------------------------------------------------------------------------------------------------------------------------------------------------------------------------------------------------------------------------------------------------------------------------------------------------------------------------------------------------------------------------------------------------------------------------------------------------------------------------------------------------------------------------------------------------------------------------------------------------------------------------------------------------------------------------------------------------------------------------------------------------------------------------------------------------------------------------------------------------------------------------------------------------------------------------------------------------------------------------------------------------------------------------------------------------------------------------------------------------------------------------------------------------------------------------------------------------------------------------------------------------------------------------------------------------------------------------------------------------------------------------------------------------------------------------------------------------------------------------------------------------------------------------------------------------------------------------------------------------------------------------------------------------------------------------------------------------------------------------------------------------------------------------------------------------------------------------------------------------------------------------------------------------------------------------------------------------------------------------------------------------------------------------------------------------------------------------------------------------------------------------------------------------------------------------------------------------------------------------------------------------------------------------------------------------------------------------------------------------------------------------------------------------------------------------------------------------------------------------------------------------------------------------------------------------------------------------------------------------------|--------------------------------------------------------------------------------------------------------------------------------|
|                           |              |                                                               |                                                                                                                                                                                                                                                    | layer surgical mask, intubation and chest compression, respiratory secretion and sputum, pathologic specimens and deceased, contact date and taking training, nose wash and taking training, and glasses and goggles highly correlated                                                                                                                                                                                                                                                                                                                                                                                                                                                                                                                                                                                                                                                                                                                                                                                                                                                                                                                                                                                                                                                                                                                                                                                                                                                                                                                                                                                                                                                                                                                                                                                                                                                                                                                                                                                                                                                                                                                                                                                                                                                                                                                                                                                                                                                                                                                                                                                                                                                                                                                                                                                                                                                                                                                                                                                                                                                                                                                                                                                                                        |                                                                                                                                |
| Ma et al, 2004 (52)       | Case-control | China (Beijing); 5 hospitals; 2003 (exact dates not reported) | <p>47 HCW cases and 426 controls</p> <ul style="list-style-type: none"> <li>• Mean age, 29 y (cases)</li> <li>• 70% female</li> <li>• Physicians, nurses, care givers and custodians and other medical personnel (numbers not provided)</li> </ul> | <p>Unadjusted OR (95% CI) for SARS-1</p> <ul style="list-style-type: none"> <li>• HCW role: caregiver/custodian vs. other role (reference): 1.29 (0.27-5.86) <ul style="list-style-type: none"> <li>◦ Nurse: 0.49 (0.19-1.29)</li> <li>◦ Physician: <b>0.32 (0.11-0.95)</b></li> </ul> </li> <li>• Time in current position &lt;1 y vs. ≥1 y: <b>3.08 (1.52-6.19)</b></li> <li>• Participation in emergency rescue vs. not: <b>3.10 (1.56-6.16)</b></li> <li>• Eye goggles vs. no goggles: <b>0.24 (0.10-0.55)</b></li> <li>• Exposure to secretions vs. not: <b>3.98 (2.00-7.92)</b></li> <li>• Mask use vs. no mask: <b>0.24 (0.09-0.64)</b></li> <li>• Mask type: disposable vs. ≤12-layer (reference): <b>0.13 (0.05-0.34)</b> <ul style="list-style-type: none"> <li>◦ &gt;16-layer: <b>0.06 (0.03-0.15)</b></li> <li>◦ N95 and respirator: <b>0.00 (0.00-0.33)</b></li> </ul> </li> <li>• Gowns vs. no gowns: <b>0.03 (0.01-0.08)</b></li> <li>• 1 gown layer vs. no gown (reference): <b>0.03 (0.01-0.09)</b>; 2 layers: <b>0.03 (0.01-0.12)</b>; 3 layers: <b>0.02 (0.00-0.07)</b>; 4 layers: <b>0.04 (0.01-0.19)</b></li> <li>• Gloves vs. no gloves: <b>0.43 (0.22-0.85)</b></li> <li>• Eye cover vs. no eye cover: <b>0.28 (0.14-0.57)</b></li> <li>• Prophylactic medicine (yes vs. no): <b>0.31 (0.15-0.65)</b></li> <li>• Use of disinfectant for hands (yes vs. no): <b>0.40 (0.19-0.81)</b></li> <li>• Handwashing (yes vs. no): 0.53 (0.26-1.06)</li> <li>• Nasal cleaning (yes vs. no): <b>0.27 (0.11-0.62)</b></li> <li>• Training (yes vs. no): <b>0.18 (0.09-0.36)</b></li> <li>• Accumulated contact days: <b>0.83 (0.80-0.86)</b></li> <li>• Average number of patients contacted each day: <b>0.73 (0.66-0.80)</b></li> <li>• Average hours working in the isolation room each day: <b>0.73 (0.68-0.78)</b>; maximum hours: <b>0.79 (0.75-0.83)</b></li> <li>• Average hours working in the contaminated area each day, <b>0.67 (0.61-0.72)</b>; maximum hours, <b>0.76 (0.71-0.80)</b></li> <li>• Average hours working in the semicontaminated area each day, <b>0.63 (0.55-0.71)</b>; maximum hours, <b>0.70 (0.63-0.77)</b></li> <li>• Number of supervised beds: <b>0.84 (0.80-0.88)</b></li> <li>• Caring everyday life and contact with patients' secretions vs. medical exam, radiological exam, transferring infected patients, contact with dead body (reference): <b>3.22 (1.29-8.24)</b> <ul style="list-style-type: none"> <li>◦ Transfusion: 1.06 (0.21-4.57)</li> <li>◦ Intubation, tracheotomy, airway management, chest compressions: <b>6.22 (2.19-18.05)</b></li> <li>◦ ICU and special care: 2.59 (0.61-10.31)</li> </ul> </li> </ul> <p>Adjusted OR (95% CI) for SARS-1 (factors in forward stepwise model)</p> <ul style="list-style-type: none"> <li>• Goggles vs. no goggles: <b>0.27 (0.10 to 0.73)</b></li> <li>• Exposure to secretions vs not: <b>4.70 (1.84-11.97)</b></li> <li>• Gowns vs. no gowns: <b>0.02 (0.01-0.04)</b></li> <li>• Time in current position &lt;1 y vs. ≥1 y: <b>4.22 (1.67-10.66)</b></li> <li>• Daily care with and contact with patients' secretions: <b>3.02 (1.23-7.46)</b></li> <li>• Type of mask (≤12 layers of cotton vs. others): <b>76.68 (16.74-351.31)</b></li> </ul> | Potential recall bias; controls were exposed to SARS-1 patients but otherwise not matched; collinearity in model not addressed |
| Nishiura et al, 2005 (56) | Case-control | Vietnam (Hanoi); single hospital; 26 February-28 April 2003   | <p>29 HCW cases with SARS-1 and 98 controls</p> <ul style="list-style-type: none"> <li>• 57% aged 29-39 y; 33% 30-39 y; 43% 40-50 y</li> <li>• 60% female</li> <li>• 13% doctor, 26% nurse, 54% other HCW, 33% relative of</li> </ul>              | <p>Unadjusted OR (95% CI) for SARS-1</p> <ul style="list-style-type: none"> <li>• Female vs. male: <b>3.3 (1.2-9.0)</b></li> <li>• Age: <ul style="list-style-type: none"> <li>◦ 29 y: 0.9 (0.3-2.3)</li> <li>◦ 30-39 y: 0.4 (0.2-1.1)</li> <li>◦ 40-49 y: <b>2.8 (1.2-6.6)</b></li> <li>◦ 50 y: 0.7 (0.1-3.2)</li> </ul> </li> </ul>                                                                                                                                                                                                                                                                                                                                                                                                                                                                                                                                                                                                                                                                                                                                                                                                                                                                                                                                                                                                                                                                                                                                                                                                                                                                                                                                                                                                                                                                                                                                                                                                                                                                                                                                                                                                                                                                                                                                                                                                                                                                                                                                                                                                                                                                                                                                                                                                                                                                                                                                                                                                                                                                                                                                                                                                                                                                                                                         | Potential recall bias; controls not matched; 42% of controls were non-HCW relatives of patients                                |

|                           |              |                                                                                                  |                                                                                                                                                                                                                                                                                 |                                                                                                                                                                                                                                                                                                                                                                                                                                                                                                                                                                                                                                                                                                                                                                                                                                                                                                                                                                                                                                                                                                                                                                                                                                                                                                                                                                                                                                                                                                                                                                                                                                                                                                                                                                                                                                                                                                                                                                                                                                                                                                                                                                                                                                                                                                                                                                                                                                                                                                                                                                     |                                                                                                                                |
|---------------------------|--------------|--------------------------------------------------------------------------------------------------|---------------------------------------------------------------------------------------------------------------------------------------------------------------------------------------------------------------------------------------------------------------------------------|---------------------------------------------------------------------------------------------------------------------------------------------------------------------------------------------------------------------------------------------------------------------------------------------------------------------------------------------------------------------------------------------------------------------------------------------------------------------------------------------------------------------------------------------------------------------------------------------------------------------------------------------------------------------------------------------------------------------------------------------------------------------------------------------------------------------------------------------------------------------------------------------------------------------------------------------------------------------------------------------------------------------------------------------------------------------------------------------------------------------------------------------------------------------------------------------------------------------------------------------------------------------------------------------------------------------------------------------------------------------------------------------------------------------------------------------------------------------------------------------------------------------------------------------------------------------------------------------------------------------------------------------------------------------------------------------------------------------------------------------------------------------------------------------------------------------------------------------------------------------------------------------------------------------------------------------------------------------------------------------------------------------------------------------------------------------------------------------------------------------------------------------------------------------------------------------------------------------------------------------------------------------------------------------------------------------------------------------------------------------------------------------------------------------------------------------------------------------------------------------------------------------------------------------------------------------|--------------------------------------------------------------------------------------------------------------------------------|
|                           |              |                                                                                                  | patient                                                                                                                                                                                                                                                                         | <ul style="list-style-type: none"> <li>Occupation: <ul style="list-style-type: none"> <li>Doctor: 0.8 (0.2-2.9)</li> <li>Nurse: <b>3.2 (1.3-7.7)</b></li> <li>Other HCW: 2.2 (0.9-5.2)</li> </ul> </li> <li>Relative of patient: <b>&lt;0.1 (0.0-0.4)</b></li> </ul> <p>Period 1 (26 February-4 March) and period 2 (5-10 March)</p> <ul style="list-style-type: none"> <li>All precautionary measures (yes vs. no): <b>0.2 (0.0-1.0)</b> and <b>&lt;0.1 (0.0-0.3)</b></li> <li>Handwashing before (yes vs. no): 1.0 (0.4-2.3) and not calculated (100% in cases)</li> <li>Handwashing after (yes vs. no): 1.1 (0.5-2.8) and not calculated (100% in cases)</li> <li>Mask vs. no mask: <b>0.3 (0.1-0.7)</b> and <b>0.1 (0.0 to 0.3)</b></li> <li>Gloves vs. no gloves: 0.7 (0.3-1.9) and not calculated (100% in cases)</li> <li>Gowns vs. no gowns: <b>0.2 (0.0-0.8)</b> and not calculated (100% in controls)</li> </ul>                                                                                                                                                                                                                                                                                                                                                                                                                                                                                                                                                                                                                                                                                                                                                                                                                                                                                                                                                                                                                                                                                                                                                                                                                                                                                                                                                                                                                                                                                                                                                                                                                                          |                                                                                                                                |
| Pei et al, 2006 (58)      | Case-control | China; 3 hospitals; April-June 2004                                                              | 147 HCW cases with SARS-1 and 296 controls <ul style="list-style-type: none"> <li>Mean age, 32 y (cases)</li> <li>81.6% female (cases)</li> <li>25.9% doctor, 51.7% nurse, 4.1% nursing staff, 3.4% worker, 11.6% technician, 1.4% administrator, 2.0% other (cases)</li> </ul> | Unadjusted OR (95% CI) for SARS-1 <ul style="list-style-type: none"> <li>SARS-1 education before treating SARS-1 patients (yes vs. no): <b>0.38 (0.17-0.80)</b></li> <li>SARS-1 preventive training (yes vs. no): <b>0.07 (0.03-0.13)</b></li> <li>Isolated areas in SARS-1 wards (yes vs. no): <b>0.25 (0.16-0.40)</b></li> <li>Working areas didn't overlap (yes vs. no): <b>0.24 (0.15-0.40)</b></li> <li>Endotracheal intubation (yes vs. no): <b>9.06 (4.12-19.92)</b></li> <li>Participating in care of critical care patients (yes vs. no): <b>1.72 (1.11-2.65)</b></li> <li>Avoiding face to face contact with patients (yes vs. no): <b>0.29 (0.13-0.64)</b></li> <li>Keeping a certain distance from SARS-1 patients (yes vs. no): <b>0.45 (0.28-0.73)</b></li> <li>1-layer disposable suit vs. no suit (reference): <b>0.23 (0.12-0.42)</b>; at least double layer: <b>0.03 (0.01-0.10)</b></li> <li>General cotton mask vs. no mask (reference): <b>0.48 (0.25-0.95)</b>; double 12-layer cotton mask: <b>0.13 (0.05-0.30)</b></li> <li>1-layer plastic gloves vs. no gloves (reference): <b>0.11 (0.04-0.27)</b>; one layer latex medical gloves: <b>0.08 (0.04-0.19)</b>; at least double layer latex medical gloves: <b>0.07 (0.03-0.16)</b></li> <li>Face screen or goggles (yes vs. no): <b>0.50 (0.27-0.75)</b></li> <li>Changing PPE &lt;4 h (yes vs. no): <b>0.50 (0.31-0.82)</b></li> <li>Isolating medical staff's offices from SARS-1 wards (yes vs. no): <b>0.57 (0.38-0.87)</b></li> <li>Using ventilator in the office (yes vs. no): <b>0.18 (0.11-0.31)</b></li> <li>Well-ventilated office (yes vs. no): <b>0.11 (0.06-0.22)</b></li> <li>No-touch hand washing equipment (yes vs. no): <b>0.11 (0.02-0.45)</b></li> <li>Gargling (yes vs. no): 0.47 (0.22-1.01)</li> <li>Interferon-alfa for prophylaxis (yes vs. no): <b>0.19 (0.06-0.65)</b></li> <li>History of diabetes (yes vs. no): <b>3.04 (2.65-3.47)</b></li> </ul> <p>Adjusted OR (95% CI) for SARS-1 (factors included in multivariate model)</p> <ul style="list-style-type: none"> <li>Endotracheal intubation vs. no intubation: <b>30.79 (7.91-119.84)</b></li> <li>At least double-layer disposable suit when caring for SARS patients vs. no suit: <b>0.05 (0.007-0.39)</b></li> <li>1-layer plastic gloves vs. no gloves: <b>0.10 (0.02-0.42)</b></li> <li>1-layer latex gloves vs. no gloves: <b>0.10 (0.03-0.42)</b></li> <li>Hand-sanitizing with iodine (yes vs. no): 0.23 (0.04-1.32)</li> <li>Well-ventilated office (yes vs. no): 0.32 (0.09-1.15)</li> </ul> | Potential recall bias; controls were exposed to SARS-1 patients but otherwise not matched; collinearity in model not addressed |
| Reynolds et al, 2006 (62) | Case-control | Vietnam (Hanoi); single hospital; contact with infected patient occurred between 26 February and | 36 HCW cases with SARS-1 and 157 controls (nested analysis based on 22 cases and 45 controls) <ul style="list-style-type: none"> <li>Mean age, and sex and not</li> </ul>                                                                                                       | Unadjusted OR (95% CI) for SARS-1 <ul style="list-style-type: none"> <li>Touched index patient: 2.8 (0.9-8.5)</li> <li>Talked to or touched index patient without mask: 1.9 (0.6-5.9)</li> <li>Came within 1 m of index patient: <b>9.3 (2.8-30.9)</b></li> </ul>                                                                                                                                                                                                                                                                                                                                                                                                                                                                                                                                                                                                                                                                                                                                                                                                                                                                                                                                                                                                                                                                                                                                                                                                                                                                                                                                                                                                                                                                                                                                                                                                                                                                                                                                                                                                                                                                                                                                                                                                                                                                                                                                                                                                                                                                                                   | Potential recall bias; controls were exposed to SARS-1 patients but otherwise not matched;                                     |

|                          |              |                                               |                                                                                                                                                                                                                            |                                                                                                                                                                                                                                                                                                                                                                                                                                                                                                                                                                                                                                                                                                                                                                                                                                                                                                                                                                                                                                                                                                                                                                                                                                                                                                                                                                                                                                                                                                                                                                                                                                                                                                                                                                                                                                                                                                     |                                                                                                                                                                  |
|--------------------------|--------------|-----------------------------------------------|----------------------------------------------------------------------------------------------------------------------------------------------------------------------------------------------------------------------------|-----------------------------------------------------------------------------------------------------------------------------------------------------------------------------------------------------------------------------------------------------------------------------------------------------------------------------------------------------------------------------------------------------------------------------------------------------------------------------------------------------------------------------------------------------------------------------------------------------------------------------------------------------------------------------------------------------------------------------------------------------------------------------------------------------------------------------------------------------------------------------------------------------------------------------------------------------------------------------------------------------------------------------------------------------------------------------------------------------------------------------------------------------------------------------------------------------------------------------------------------------------------------------------------------------------------------------------------------------------------------------------------------------------------------------------------------------------------------------------------------------------------------------------------------------------------------------------------------------------------------------------------------------------------------------------------------------------------------------------------------------------------------------------------------------------------------------------------------------------------------------------------------------|------------------------------------------------------------------------------------------------------------------------------------------------------------------|
|                          |              | 5 March 2003                                  | <ul style="list-style-type: none"> <li>reported</li> <li>19.4% physician, 38.9% nurse, 11.1% midwife, 5.6% other clinical staff, 16.7% sanitation/kitchen, 5.6% other nonclinical staff</li> </ul>                         | <ul style="list-style-type: none"> <li>Came within 1 m of index patient without mask: <b>5.4 (1.8-16.3)</b></li> <li>Spoke with index patient: <b>3.5 (1.2-10.4)</b></li> <li>Entered patient room: <b>20.0 (4.1-97.1)</b></li> <li>Spoke with index patient in his room: <b>3.7 (1.1-12.6)</b></li> <li>Saw (viewed) index patient: <b>14.0 (3.6-55.3)</b></li> <li>Visited patient room when patient was not there: <b>3.7 (1.3-10.9)</b></li> <li>Touched visibly contaminated surface: <b>7.8 (2.3-25.9)</b></li> <li>Entered general ward: <b>8.0 (1.7-38.4)</b></li> <li>Upper respiratory infection within prior 6 months: <b>0.2 (0.04-0.9)</b></li> <li>"Other" clinical job: <b>0.2 (0.03-0.7)</b></li> <li>Direct patient care activities: 2.0 (0.7-5.6)</li> <li>Sanitation/kitchen job: 2.2 (0.7-7.0)</li> </ul>                                                                                                                                                                                                                                                                                                                                                                                                                                                                                                                                                                                                                                                                                                                                                                                                                                                                                                                                                                                                                                                                       | potential selection bias for nested analysis                                                                                                                     |
| Seto et al, 2003 (65)    | Case-control | Hong Kong; 5 hospitals; dates not reported    | <ul style="list-style-type: none"> <li>13 HCW cases and 241 controls</li> <li>Age not reported</li> <li>69% female (cases)</li> <li>15% doctor, 46% nurse, 31% health care assistant, 8% domestic staff (cases)</li> </ul> | <p><b>SARS-1 cases by mask type</b></p> <ul style="list-style-type: none"> <li>Paper mask: 7.1% (2/28)</li> <li>Surgical mask: 0% (0/51)</li> <li>N95: 0% (0/92)</li> </ul> <p>Unadjusted OR (95% CI) for SARS-1; based on response of "yes" or "most of the time"</p> <ul style="list-style-type: none"> <li>Mask use vs. nonuse: <b>0.08 (0.02-0.33)</b> <ul style="list-style-type: none"> <li>Paper mask use: 0.50 (0.10-2.42)†</li> <li>Surgical mask use: 0.06 (0.004-1.06)†</li> <li>N95 mask use: <b>0.003 (0.002-0.59)†</b></li> </ul> </li> <li>Glove use vs. nonuse: 0.5 (0.14-1.7)</li> <li>Gown use vs. nonuse: OR not calculated, <b>use 0% in cases vs. 34% in controls, P = 0.006</b></li> <li>Hand-washing vs. no handwashing: 0.2 (0.05-1)</li> <li>All <b>infection</b> control measures vs. not all measures: OR not calculated, all measures <b>0% in cases vs. 29% in controls, P = 0.02</b></li> </ul>                                                                                                                                                                                                                                                                                                                                                                                                                                                                                                                                                                                                                                                                                                                                                                                                                                                                                                                                                                       | Potential recall bias; no control for confounding; controls not matched other than exposure to patients with SARS; laboratory confirmation of cases not reported |
| Teleman et al, 2004 (66) | Case-control | Singapore; 1 hospital; 1-22 March 2003        | <ul style="list-style-type: none"> <li>36 HCW cases with SARS-1 and 50 controls</li> <li>63.9% aged &lt;30 y (cases)</li> <li>88.9% female (cases)</li> <li>72% doctor or nurse; 28% other HCW</li> </ul>                  | <p>Unadjusted OR (95% CI) for SARS-1</p> <ul style="list-style-type: none"> <li>Female vs. male: 6.1 (0.7-57.3)</li> <li>Chinese vs. non-Chinese: 2.4 (1.0-5.9)</li> <li>Age &lt;30 vs. ≥30 y: 1.4 (0.3-1.7)</li> <li>Comorbid condition (yes vs. no): 0.9 (0.3-3.2)</li> <li>Vaccination in previous 5 y (yes vs. no): 1.03 (0.4-2.7)</li> <li>Doctor or nurse vs. other HCWs: 0.7 (0.3-1.9)</li> <li>Distance to source of infection &lt; 1 meter vs. ≥1 meter: 0.9 (0.2-3.6)</li> <li>Duration of exposure ≥60 min vs. &lt;60 min: 0.7 (0.3-1.6)</li> <li>Wearing N95 mask vs. not wearing: <b>0.1 (0.03-0.4)</b></li> <li>Wearing gloves vs. not wearing: 0.5 (0.2-1.2)</li> <li>Wearing gowns vs. not wearing: 0.5 (0.1-1.4)</li> <li>Touched patients (yes vs. no): 1.0 (0.4-3.0)</li> <li>Touched patients' personal belongings (yes vs. no): 0.6 (0.2-1.7)</li> <li>Contact with respiratory secretions (yes vs. no): <b>6.9 (1.4-34.6)</b></li> <li>Performed venipuncture (yes vs. no): 0.8 (0.3-2.4)</li> <li>Performed/assisted in intubation (yes vs. no): 1.5 (0.4-5.4)</li> <li>Performed suction of body fluids (yes vs. no): 1.01 (0.4-2.8)</li> <li>Administered oxygen (yes vs. no): 1.0 (0.3-2.8)</li> <li>Hand washing after each patient (yes vs. no): <b>0.06 (0.007-0.5)</b></li> </ul> <p>Adjusted OR (95% CI) for SARS-1 (factors with P &lt; 0.20 in univariate analysis included)</p> <ul style="list-style-type: none"> <li>Male vs. female: 2.9 (0.2-34.0)</li> <li>Chinese vs. non-Chinese: 2.0 (0.7-6.1)</li> <li>Wearing N95 mask vs. not wearing: <b>0.1 (0.02-0.9)</b></li> <li>Wearing gloves vs. not wearing: 1.5 (0.3-7.2)</li> <li>Wearing gowns vs. not wearing: 0.5 (0.4-6.9)</li> <li>Hand washing after each patient (yes vs. no): <b>0.07 (0.008-0.7)</b></li> <li>Contact with respiratory secretions (yes vs. no): <b>21.8 (1.7-274.8)</b></li> </ul> | Potential recall bias; controls not matched other than exposure to patients with probable SARS; collinearity in model not addressed                              |
| Yen et al, 2011 (76)     | Case-control | Taiwan; 50 hospitals; 25 February-5 July 2003 | <ul style="list-style-type: none"> <li>50 hospitals</li> <li>Cases: 19 hospitals with at least</li> </ul>                                                                                                                  | <p>Unadjusted OR (95% CI) for effectiveness (defined as the last nosocomial SARS-1 infection in the hospital occurred before the date</p>                                                                                                                                                                                                                                                                                                                                                                                                                                                                                                                                                                                                                                                                                                                                                                                                                                                                                                                                                                                                                                                                                                                                                                                                                                                                                                                                                                                                                                                                                                                                                                                                                                                                                                                                                           | No control for severity of outbreak across                                                                                                                       |

- 1 case of SARS-1 in HCWs
- Controls: 31 hospitals with no cases

of implementation of the measure†

- Triage for patients with fever of unknown origin in ED: **0.10 (0.02-0.43)**
- Set up fever ED station outside ED: **0.04 (0.01-0.22)**
- Body temperature screening in main entrance: **0.02 (0.00-0.40)**
- Body temperature screening for patients: **0.05 (0.01-0.41)**
- Body temperature screening for HCWs: **0.05 (0.01-0.41)**
- Separation of fever patients within physical barrier isolated region in ED: 0.26 (0.06-1.08)
- Moving patient into a special designated centralized isolation ward or evaluate patients within a general ward: **0.04 (0.01-0.18)**
- Separate elevators and routes for patients and HCWs: **0.09 (0.02-0.33)**
- Installation of physical barriers between zones of risk for isolation ward: **0.07 (0.01-0.38)**
- Installation of handwashing station in ED: 0.53 (0.14-2.00)
- Disinfectant solution available at main entrance (of hospital): **0.04 (0.004-0.33)**
- Set up handwashing facilities around whole hospital: **0.20 (0.06-0.69)**
- Set up alcohol dispensers at checkpoints for glove-on hand rubbing between zones of risk: **0.01 (0.001-0.11)**
- Set up standardized negative pressure isolation room in hospital: **0.17 (0.05-0.63)**
- Set up simplified negative pressure isolation room within hospital: **0.29 (0.09-0.93)**
- Wearing N95 mask in ED: 0.35 (0.11-1.13)
- Wearing N95 mask within zones of risk: **0.02 (0.001-0.39)**
- Mask worn when entering hospital: **0.02 (0.001-0.40)**
- Wearing surgical mask in outpatient department: **0.09 (0.01-0.88)**
- Wearing surgical mask in ward: **0.09 (0.01-0.88)**
- Established crisis response team: **0.02 (0.001-0.40)**
- Exclude visitors from hospital: **0.11 (0.03-0.41)**
- Support from administration for infection control practitioner: **0.11 (0.03-0.41)**
- Support from administration for infectious diseases specialist or physician: **0.09 (0.02-0.52)**
- Support from superintendent/directors for infection control: **0.08 (0.01-0.42)**

hospital; unit of analysis is hospitals rather than HCWs; highly correlated risk factors dropped from model but correlated risk factors not reported

Adjusted OR (95% CI) for effectiveness (defined as the last nosocomial SARS-1 infection occurred before the date of implementation of the measure) (factors included in forward stepwise model)

- Set up fever screen station outside of ED: **0.05 (0.004-0.69)**
- Set up alcohol dispensers at checkpoint for glove-on hand rubbing between zones of risk: **0.04 (0.003-0.63)**

|                      |              |                                                    |                                                                                                                                                                                                        |                                                                                                                                                                                                                                                                                                                                                                                                                                                                                                                                                                                                                                                                                                                                                                                                                                                                                                                                                                                           |                                                                                                                                |
|----------------------|--------------|----------------------------------------------------|--------------------------------------------------------------------------------------------------------------------------------------------------------------------------------------------------------|-------------------------------------------------------------------------------------------------------------------------------------------------------------------------------------------------------------------------------------------------------------------------------------------------------------------------------------------------------------------------------------------------------------------------------------------------------------------------------------------------------------------------------------------------------------------------------------------------------------------------------------------------------------------------------------------------------------------------------------------------------------------------------------------------------------------------------------------------------------------------------------------------------------------------------------------------------------------------------------------|--------------------------------------------------------------------------------------------------------------------------------|
| Yin et al, 2004 (78) | Case-control | China (Guangdong); 10 hospitals; April to May 2003 | 77 HCW cases and 180 controls <ul style="list-style-type: none"> <li>• 54% aged 18-29 y; 38% aged 30-39 y (cases)</li> <li>• 77% female (cases)</li> <li>• 38% physician, 62% nurse (cases)</li> </ul> | Unadjusted OR (95% CI) for SARS-1 <ul style="list-style-type: none"> <li>• Use of mask vs. no mask: <b>0.08 (0.01-0.43)</b></li> <li>• ≥12-layer mask vs. no mask: <b>0.07 (0.01-0.34)</b></li> <li>• Disposable mask vs. no mask: 0.22 (0.02-1.29)</li> <li>• Disposable mask vs. ≥12 layer mask: <b>3.39 (1.72-6.67)†</b></li> <li>• Use of goggles vs. no goggles: <b>0.10 (0.05-0.20)</b></li> <li>• Protection of nasal and eye mucosa: <b>0.13 (0.02-0.97)</b></li> <li>• Use of shoe cover vs. no shoe cover: <b>0.18 (0.10-0.35)</b></li> <li>• Use of gown vs. no gown: <b>0.22 (0.12-0.39)</b></li> <li>• Use of gloves vs. no gloves: <b>0.30 (0.17-0.53)</b></li> <li>• Mouth washing vs. no mouth washing: <b>0.35 (0.13-0.93)</b></li> <li>• Showering and changing after work (before going home) vs. not: <b>0.37 (0.19-0.72)</b></li> <li>• Check facial mask: <b>0.42 (0.23-0.78)</b></li> <li>• Take oseltamivir phosphate vs. not: <b>0.43 (0.24-0.78)</b></li> </ul> | Potential recall bias; controls were exposed to SARS-1 patients but otherwise not matched; collinearity in model not addressed |
|----------------------|--------------|----------------------------------------------------|--------------------------------------------------------------------------------------------------------------------------------------------------------------------------------------------------------|-------------------------------------------------------------------------------------------------------------------------------------------------------------------------------------------------------------------------------------------------------------------------------------------------------------------------------------------------------------------------------------------------------------------------------------------------------------------------------------------------------------------------------------------------------------------------------------------------------------------------------------------------------------------------------------------------------------------------------------------------------------------------------------------------------------------------------------------------------------------------------------------------------------------------------------------------------------------------------------------|--------------------------------------------------------------------------------------------------------------------------------|

|                            |                      |                                                 |                                                                                                                                                                                                                                                                                                   |                                                                                                                                                                                                                                                                                                                                                                                                                                                                                                                                                                                                                                                                                                                                                                                                                                                                                                                                                                                                                                                                                                                                      |                                                                                         |
|----------------------------|----------------------|-------------------------------------------------|---------------------------------------------------------------------------------------------------------------------------------------------------------------------------------------------------------------------------------------------------------------------------------------------------|--------------------------------------------------------------------------------------------------------------------------------------------------------------------------------------------------------------------------------------------------------------------------------------------------------------------------------------------------------------------------------------------------------------------------------------------------------------------------------------------------------------------------------------------------------------------------------------------------------------------------------------------------------------------------------------------------------------------------------------------------------------------------------------------------------------------------------------------------------------------------------------------------------------------------------------------------------------------------------------------------------------------------------------------------------------------------------------------------------------------------------------|-----------------------------------------------------------------------------------------|
|                            |                      |                                                 |                                                                                                                                                                                                                                                                                                   | <ul style="list-style-type: none"> <li>Food/drink/smoking in patient area (no vs. yes): <b>0.43 (0.24-0.77)</b></li> <li>Disinfection and wash hands (yes vs. no): <b>0.49 (0.28-0.85)</b></li> <li>Use of nose clip vs. no nose clip: <b>0.70 (0.38-1.31)</b></li> <li>Preventive measures recommended by Ministry of Health adopted 1 vs. 0 (reference): 0.62 (0.20-1.96); 2: 0.63 (0.19-1.99); 3: 0.33 (0.09-1.18); 4: <b>0.23 (0.07-0.74)</b>; 5: <b>0.07 (0.02-0.27)</b>; 6: <b>0.02 (0.00-0.15)</b></li> <li>WHO guide adopted (yes vs. no): <b>0.00 (0.00-0.08)</b></li> </ul> <p>Adjusted OR (95% CI) for SARS-1 (factors in forward stepwise model)</p> <ul style="list-style-type: none"> <li>Use of mask (12 layers or better) vs. no mask: <b>0.78 (0.60-0.99)</b></li> <li>Use of goggles: <b>0.20 (0.10-0.41)</b></li> <li>Use of shoe cover: <b>0.58 (0.39-0.86)</b></li> </ul> <p><i>Dose-response relationship present for mask, gown, gloves, goggles, shoe cover, gargle, use of eye and nose drops, and showering and changing after work. Attack rate in HCWs without any protection was 61.5% (16/26).</i></p> |                                                                                         |
| Chen et al, 2005 (27)      | Cross-sectional      | China (Guangzhou); 3 hospitals; May 2003        | <p>1856 HCWs (1135 worked with SARS patients)</p> <ul style="list-style-type: none"> <li>Mean age, 30.8 y</li> <li>71.6% female</li> <li>30.7% doctor, 48.3% nurse, 5.5% health attendant, 4.0% laboratory technician, 11.5% other</li> <li>8.3% (95/1147) seropositive for SARS-CoV-1</li> </ul> | <p>Prevalence of SARS-CoV-1 seropositivity among HCWs who worked with SARS patients</p> <ul style="list-style-type: none"> <li>Age <ul style="list-style-type: none"> <li>&lt;26 y: 12.4% (44/355)</li> <li>26-30 y: 5.5% (17/310)</li> <li>31-35 y: 6.6% (14/211)</li> <li>36-40: y 7.6% (9/118)</li> <li>&gt;40 y: 7.8% (11/141)</li> </ul> </li> <li>Male: 4.7% (15/306)</li> <li>Female: 9.7% (80/743)</li> <li>Department SARS ward: 3.2% (13/409)</li> <li>ED/fever clinic: 2.1% (4/188)</li> <li>Infectious disease department: 15.2% (19/125)</li> <li>Respiratory diseases department: 36.0% (36/100)</li> <li>ICU: 12.7% (7/55)</li> <li>Radiography: 3.5% (2/57)</li> <li>Laboratory: 0% (0/66)</li> <li>Others (internal medicine, surgery, logistic service): 9.5% (14/147)</li> <li>Job title: <ul style="list-style-type: none"> <li>Doctor: 6.2% (24/388)</li> <li>Nurse: 10.2% (52/510)</li> <li>Health attendant: 13.2% (12/91)</li> <li>Technician in laboratory: 0% (0/66)</li> <li>Others: 7.6% (7/92)</li> </ul> </li> </ul>                                                                                   | No control for confounding; 16% of HCWs with SARS-CoV IgG did not have symptoms of SARS |
| <b>MERS-CoV</b>            |                      |                                                 |                                                                                                                                                                                                                                                                                                   |                                                                                                                                                                                                                                                                                                                                                                                                                                                                                                                                                                                                                                                                                                                                                                                                                                                                                                                                                                                                                                                                                                                                      |                                                                                         |
| Alraddadi et al, 2016 (19) | Retrospective cohort | Saudi Arabia; 1 hospital; May 2014 to June 2014 | <p>283 HCWs</p> <ul style="list-style-type: none"> <li>Mean age, 40 y (cases)</li> <li>64.4% female</li> <li>55% nurse, 16% physician, 12% respiratory therapist, 6.8% radiology technicians, 9.2% other (MICU and EDU HCWs)</li> <li>7.0% (20/283) seropositive for MERS-CoV</li> </ul>          | <p>Incidence of MERS-CoV seropositivity in HCWs</p> <ul style="list-style-type: none"> <li>MICU: 11.7% (15/128)</li> <li>ED: 4.1% (5/122)</li> <li>Neurology unit: 0% (0/33)</li> <li>Radiology technician (MICU and ED): 29.4% (5/17)</li> <li>Nurses (MICU and ED): 9.4% (13/138)</li> <li>Respiratory therapist (MICU and ED): 3.2% (1/31)</li> <li>Physicians (MICU and ED): 2.4% (1/41)</li> <li>Patient transport or clerical staff (MICU and ED): 0% (0/21)</li> </ul> <p>Mortality: 0% (0/20)<br/> Mechanical ventilation: 15% (3/20)<br/> Hospital admission without mechanical ventilation: 10% (2/20)</p> <p>RR (95% CI) for MERS-CoV seropositivity, present vs. absent</p> <ul style="list-style-type: none"> <li>Comorbidity: 1.67 (0.70-3.96) <ul style="list-style-type: none"> <li>Diabetes mellitus: 1.89 (0.60-5.95)</li> </ul> </li> <li>Exposure to MERS-CoV patient: 1.38 (0.20-9.72)</li> <li>Taking vital signs: 0.92 (0.39-2.20); providing medication: 1.05</li> </ul>                                                                                                                                     | Potential recall bias                                                                   |

(0.44-2.49); placing urinary catheter: 0.67 (0.20-2.21); bathing: 1.14 (0.47-2.77); feeding: 1.02 (0.40-2.56); lifting, positioning: 1.99 (0.74-5.33); emptying bedpan: 1.57 (0.66-3.73); changing linen: 1.45 (0.61-3.47); providing injection: 1.54 (0.65-3.63); placing intravascular device: 2.30 (0.98-5.41); performing hemodialysis: 0.59 (0.14-2.46); taking medical history: 0.59 (0.23-1.50); performing physical exam: 0.54 (0.23-1.27); drawing blood: 1.21 (0.51-2.90); collecting respiratory laboratory specimens: 0.92 (0.39-2.17); performing radiograph: 1.99 (0.84-4.70); processing clinical specimen: 1.72 (0.54-5.45); visiting in the hospital: 0.79 (0.29-2.10)

- Present for procedures listed below: 1.42 (0.43-4.66)
  - Manipulation of oxygen face mask or tubing: 0.92 (0.37-2.33)
  - Airway suction: 0.67 (0.29-1.60)
  - Noninvasive ventilation: 1.02 (0.43-2.41)
  - Manual ventilation: 0.53 (0.20-1.42)
  - Nebulizer treatments: 1.05 (0.45-2.50)
  - Intubation: 0.66 (0.27-1.63)
  - Cardiopulmonary resuscitation: 0.73 (0.29-1.84)
  - High-frequency oscillatory ventilation: 0.60 (0.08-4.25)
  - Chest tube insertion or removal: 0% vs. 9.3%,  $P = 0.23$
  - Insertion of nasogastric tube: 0.89 (0.34-2.38)
  - Insertion of peripheral line: 0.93 (0.39-2.21)
  - Insertion of central venous line: 0.62 (0.22-1.81)
  - Chest physiotherapy: 0.67 (0.20-2.21)
  - Tracheostomy care: 1.10 (0.41-2.91)
  - Bronchoscopy: 0% vs. 8.6%,  $P = 1$
  - Extubation: 3.06 (0.53-17.67)
  - Any aerosol-generating procedure: 1.13 (0.39-3.27)
- Direct contact with blood, body fluid, or excretion of MERS-CoV patient: 0.66 (0.25-1.77)
  - Blood: 0.86 (0.30-2.48)
  - Sputum: 0.88 (0.31-2.54)
  - Urine: 1.37 (0.43-4.39)
  - Feces: 1.12 (0.35-3.64)
  - Other fluids: 1.50 (0.23-9.89)
- Smoking: 1.82 (0.77-4.29)
- Currently smokes tobacco: 0.88 (0.31-2.54)
- Smoked tobacco in the past: **3.08 (1.12-7.99)**
- Respiratory pathogen infection control training: **0.32 (0.12-0.85)**
- MERS-CoV infection control training: **0.35 (0.14-0.85)**
- Same room or <2 m of any hospitalized patients with pneumonia or respiratory illness: 1.16 (0.28-4.80)

RR (95% CI) for MERS-CoV seropositivity, always vs. sometimes/never

- Gloves: 9.1% cases vs. 0% controls, RR not calculated
- Gown: 0.89 (0.36-2.21)
- Eye protection, direct contact: 0.21 (0.03-1.51)
- Eye protection, aerosol-generating procedure: 0.44 (0.13-1.51)
- Medical mask or N95 respirator, direct contact: 0.69 (0.28-1.69)
  - Medical mask: 2.06 (0.86-4.95)
  - N95: 0.44 (0.17-1.12)
- Medical mask or N95 respirator, aerosol generating procedure: **0.32 (0.12-0.86)**
  - Medical mask: 0.59 (0.20-1.71)
  - N95: 0.45 (0.16-1.29)

Adjusted RR (95% CI) for MERS-CoV seropositivity (factors included in backward stepwise model)

- N95 use always vs. sometimes or never: 0.44 (0.15-1.24)  
(medical mask almost always worn in sometimes or never group)
- Past or current smoking vs. none: 2.51 (0.92-6.87)

|                      |                      |                                               |                                                                                                                                                                                                                                                                                                |                                                                                                                                                                                                                                                                                                                                                                                                   |                                                              |
|----------------------|----------------------|-----------------------------------------------|------------------------------------------------------------------------------------------------------------------------------------------------------------------------------------------------------------------------------------------------------------------------------------------------|---------------------------------------------------------------------------------------------------------------------------------------------------------------------------------------------------------------------------------------------------------------------------------------------------------------------------------------------------------------------------------------------------|--------------------------------------------------------------|
|                      |                      |                                               |                                                                                                                                                                                                                                                                                                | <ul style="list-style-type: none"> <li>Participation in MERS-CoV training: <b>0.33 (0.12-0.90)</b></li> </ul> <p><i>Factors not included in model: Glove use, gown use, eye protection, time spent in MERS patient room, handling of MERS patient bedding, equipment, or fluids, or number of MERS patients cared for</i></p>                                                                     |                                                              |
| Kim et al, 2016 (37) | Retrospective cohort | South Korea; 31 hospitals; dates not reported | 737 HCWs with direct contact with MERS patient <ul style="list-style-type: none"> <li>Mean age, 33 y</li> <li>78% female</li> <li>19% physician; 69% nurse; 12% other</li> <li>0.27% (2/737) positive for MERS-CoV (ELISA and confirmatory IIFT); 2.0% (15/737) MERS cases excluded</li> </ul> | Incidence of MERS-CoV seropositivity (ELISA and confirmatory IIFT); MERS cases excluded <ul style="list-style-type: none"> <li>Exposure without appropriate PPE vs. never: 0.7% (2/294) vs. 0% (0/443), <math>P = 0.16</math></li> <li>Exposure without powered air-purifying respirator during aerosolizing procedure vs. never: 0.8% (1/122) vs. 0.2% (1/615), <math>P = 0.30</math></li> </ul> | Potential for recall bias; MERS cases excluded; only 2 cases |

APACHE = Acute Physiology and Chronic Health Evaluation; CoV = coronavirus; COVID-19 = coronavirus disease 2019; CPR = cardiopulmonary resuscitation; ECG = electrocardiogram; ED = emergency department; ELISA = enzyme-linked immunosorbent assay; HCW = health care worker; IIFT = indirect immunofluorescence test; MERS = Middle East respiratory syndrome; MICU = medical intensive care unit; OR = odds ratio; RR = relative risk; PCR = polymerase chain reaction; PPE = personal protective equipment; SARS = severe acute respiratory syndrome; WHO = World Health Organization.

\* Values in boldface and italics indicate a statistically significant difference between groups.

† Unadjusted OR calculated on the basis of available data.

**Appendix Table 6. Demographic Characteristics and HCW Role or Position and Risk for Infection With SARS-CoV-2, SARS-CoV-1, or MERS-CoV in HCWs\***

| Study, Year (Reference)    | Age                                                                                                                                                   | Sex                                                  | Physician                                                                                                   | Nurse                                                                                             | Other HCW Role                                                                                                                                                                                                                                    |
|----------------------------|-------------------------------------------------------------------------------------------------------------------------------------------------------|------------------------------------------------------|-------------------------------------------------------------------------------------------------------------|---------------------------------------------------------------------------------------------------|---------------------------------------------------------------------------------------------------------------------------------------------------------------------------------------------------------------------------------------------------|
| <b>SARS-CoV-2</b>          |                                                                                                                                                       |                                                      |                                                                                                             |                                                                                                   |                                                                                                                                                                                                                                                   |
| Wang et al, 2020 (70)      | -                                                                                                                                                     | -                                                    | -                                                                                                           | Nurse vs. doctor: <b>OR, 0.04 (95% CI, 0.005-0.31)†</b>                                           | Respiratory department: 0% (0/70)<br>ICU: 0% (0/169)<br>Infectious disease department: 0% (0/39)<br>Hepatobiliary and pancreatic surgery department: 11% (8/74)<br>Trauma and microsurgery department: 2% (1/44)<br>Urology department: 1% (1/97) |
| <b>SARS-CoV-1</b>          |                                                                                                                                                       |                                                      |                                                                                                             |                                                                                                   |                                                                                                                                                                                                                                                   |
| Chang et al, 2004 (25)     | Adjusted OR, 0.97 (95% CI, 0.90-1.03)                                                                                                                 | -                                                    | 6.1% (2/33)                                                                                                 | 3.2% (3/95)                                                                                       | Ambulance drivers: 16.7% (1/6)<br>Sanitation workers: 15.4% (2/13)<br>Clerks: 6.3% (1/16)<br>Administrative personnel: 0% (0/24)<br>Radiology technician: 0% (0/17)<br>Laboratory technician: 0% (0/66)                                           |
| Chen et al, 2005 (27)      | <26 y: 12.4% (44/355)<br>26-30 y: 5.5% (17/310)<br>31-35 y: 6.6% (14/211)<br>36-40 y: 7.6% (9/118)<br>>40 y: 7.8% (11/141)                            | Male: 4.7% (15/306)<br>Female: 9.7% (80/743)         | 6.2% (24/388)                                                                                               | 10.2% (52/510)                                                                                    | Laboratory technician: 0% (0/66)                                                                                                                                                                                                                  |
| Fowler et al, 2004 (30)    | -                                                                                                                                                     | -                                                    | 16.7% (3/18)                                                                                                | 7.6% (5/66)                                                                                       | Respiratory therapist: 11.1% (2/18)                                                                                                                                                                                                               |
| Ho et al, 2003 (32)        | -                                                                                                                                                     | -                                                    | 5.1% (7/138)                                                                                                | 3.8% (19/500)                                                                                     | Health care assistant: 7.9% (10/126)<br>Cleaner: 1.9% (3/158)<br>Clerical staff: 0.8% (1/131)                                                                                                                                                     |
| Ip et al, 2004 (34)        | -                                                                                                                                                     | -                                                    | 2.4% (2/85)                                                                                                 | 11.6% (38/328)                                                                                    | Allied health: 0.9% (1/114)<br>Health care/general service assistants: 11.8% (12/102)<br>Ancillary: 0% (0/113)<br>Other: 0% (0/12)                                                                                                                |
| Lau et al, 2004 (43)       | -                                                                                                                                                     | -                                                    | -                                                                                                           | 1.07% (SD 1.38)                                                                                   | Nonmedical support staff: 2.34% (SD 3.43)<br>Other technical and medical staff: 0.32% (SD 0.49);                                                                                                                                                  |
| Li et al, 2003 (45)        | -                                                                                                                                                     | -                                                    | 2.88%                                                                                                       | 4.78%                                                                                             | Nursing assistant: 6.67%<br>Other hospital staff: 0%                                                                                                                                                                                              |
| Ma et al, 2004 (64)        | -                                                                                                                                                     | -                                                    | Physician vs. other HCW (not physician, nurse or caregiver/custodian): <b>OR, 0.32 (95% CI, 0.11-0.95)†</b> | Nurse vs. other HCW (not physician, nurse, or caregiver/custodian): OR, 0.49 (95% CI, 0.19-1.29)† | -                                                                                                                                                                                                                                                 |
| Nishiura et al, 2005 (56)  | 29 y: OR, 0.9 (95% CI, 0.3-2.3)<br>30-39 y: OR, 0.4 (95% CI, 0.2-1.1)<br>40-49 y: <b>OR, 2.8 (95% CI, 1.2-6.6)</b><br>50 y: OR, 0.7 (95% CI, 0.1-3.2) | Female vs. male: <b>OR, 3.3 (95% CI, 1.2-9.0)</b>    | OR, 0.8 (95% CI, 0.2-2.9)                                                                                   | <b>OR, 3.2 (95% CI, 1.3-7.7)</b>                                                                  | -                                                                                                                                                                                                                                                 |
| Nishiyama et al, 2008 (57) | -                                                                                                                                                     | -                                                    | Physician vs. other staff: <b>adjusted OR, 40.9 (95% CI, 2.65-630)</b>                                      | Nurse vs. other staff: <b>adjusted OR, 57.3 (95% CI, 5.28-621)</b>                                | -                                                                                                                                                                                                                                                 |
| Raboud et al, 2010 (60)    | Not in model                                                                                                                                          | Not in model                                         | 5.2% (4/77)                                                                                                 | 3.9% (11/283)                                                                                     | Medical resident/intern: 12.5% (2/16)<br>Personal services assistant: 3.8% (1/25)<br>Paramedic/EMT: 100% (3/3)<br>Radiology technician 1.5% (1/67)<br>Respiratory therapist: 4.5% (4/89)                                                          |
| Teleman et al, 2004 (66)   | OR, 1.4 (95% CI, 0.3-1.7)†                                                                                                                            | Male vs. female: adjusted OR, 2.9 (95% CI, 0.2-34.0) | -                                                                                                           | -                                                                                                 | -                                                                                                                                                                                                                                                 |
| Wang et al, 2007 (69)      | -                                                                                                                                                     | Female vs. male: RR, 1.10 (95% CI, 0.14-8.74)        | -                                                                                                           | Nurse vs. physician: RR, 1.21 (95% CI, 0.15-9.61)                                                 | -                                                                                                                                                                                                                                                 |



|                               |                                                                          |                                               |                          |                            |                                                                                                                                                                                                                                               |
|-------------------------------|--------------------------------------------------------------------------|-----------------------------------------------|--------------------------|----------------------------|-----------------------------------------------------------------------------------------------------------------------------------------------------------------------------------------------------------------------------------------------|
| Wilder-Smith et al, 2005 (72) | Mean age: 29.2 y in cases vs. 33.7 y in controls, <b><i>P = 0.04</i></b> | Female vs. male: OR, 0.47 (95% CI, 0.10-2.07) | -                        | -                          | -                                                                                                                                                                                                                                             |
| <b>MERS-CoV</b>               |                                                                          |                                               |                          |                            |                                                                                                                                                                                                                                               |
| Alraddadi et al, 2016 (19)    | -                                                                        | -                                             | MICU and ED: 2.4% (1/41) | MICU and ED: 9.4% (13/138) | MICU: 11.7% (15/128)<br>ED: 4.1% (5/122)<br>Neurology unit: 0% (0/33)<br>Radiology technician (MICU and ED): 29.4% (5/17)<br>Respiratory therapist (MICU and ED): 3.2% (1/31)<br>Patient transport or clerical staff (MICU and ED): 0% (0/21) |

ED = emergency department; EMT = emergency medical technician; ICU = intensive care unit; HCW = health care worker; MICU = medical intensive care unit; OR = odds ratio; RR = relative risk.  
 \* Values in boldface and italics indicate a statistically significant difference between groups.  
 † Variable not included in a multivariate model.

**Appendix Table 7. Education or Training, Environmental and Physical Factors, and Infection Control Policies and Risk for Infection With SARS-CoV-2, SARS-CoV-1, or MERS-CoV in Health Care Workers\***

| Study, Year (Reference)    | Education or Training on Infection Control                                                                  | Ventilation or Negative Pressure Isolation Room                                                                                                                                                                                                                               | Environment and Physical Layout                                                                                                                                    | Infection Control Policies |
|----------------------------|-------------------------------------------------------------------------------------------------------------|-------------------------------------------------------------------------------------------------------------------------------------------------------------------------------------------------------------------------------------------------------------------------------|--------------------------------------------------------------------------------------------------------------------------------------------------------------------|----------------------------|
| <b>SARS-CoV-2</b>          |                                                                                                             |                                                                                                                                                                                                                                                                               |                                                                                                                                                                    |                            |
| No studies                 |                                                                                                             |                                                                                                                                                                                                                                                                               |                                                                                                                                                                    |                            |
| <b>SARS-CoV-1</b>          |                                                                                                             |                                                                                                                                                                                                                                                                               |                                                                                                                                                                    |                            |
| Chen et al, 2009 (26)      | Special training for SARS-1 (no vs. yes): <b>OR, 2.44 (95% CI, 1.41-4.23)†</b>                              | Air ventilation method in offices and SARS wards (reference, artificial central ventilation):<br>Natural ventilation: <b>adjusted OR, 0.40 (95% CI, 0.18-0.88)</b><br>Natural ventilation and additional electronic exhaust fan: <b>adjusted OR, 0.27 (95% CI, 0.16-0.63)</b> | Type of equipment for washing hands:<br>Nonautomatic vs. automatic tap (reference): <b>OR, 4.18 (95% CI, 1.66-10.51)†</b><br>Others: OR, 1.09 (95% CI, 0.12-9.74)† | -                          |
| Lau, 2004 (41)             | SARS infection control training <2 h or no training vs. ≥2 h: <b>adjusted OR, 13.6 (95% CI, 1.24-27.50)</b> | -                                                                                                                                                                                                                                                                             | -                                                                                                                                                                  | -                          |
| Liu et al, 2009 (49)       | Not taking training vs. taking training: <b>adjusted OR, 2.40 (95% CI, 1.08-5.31)</b>                       | -                                                                                                                                                                                                                                                                             | -                                                                                                                                                                  | -                          |
| Ma et al, 2004 (52)        | Training (yes vs. no): <b>OR, 0.18 (95% CI, 0.09-0.36)†</b>                                                 | -                                                                                                                                                                                                                                                                             | -                                                                                                                                                                  | -                          |
| Nishiyama et al, 2008 (57) | No attendance at lecture on nosocomial infection vs. attendance: adjusted OR, 5.49 (95% CI, 0.90-33.4)      | -                                                                                                                                                                                                                                                                             | -                                                                                                                                                                  | -                          |
| Pei et al, 2006 (58)       | SARS-1 education before treating SARS-1 patients (yes vs. no): <b>OR, 0.38 (95% CI,</b>                     | Using ventilator in the office (yes vs. no): <b>OR, 0.18 (95% CI, 0.11-</b>                                                                                                                                                                                                   | No touch hand washing equipment (yes vs. no): <b>OR, 0.11 (95% CI, 0.02-</b>                                                                                       | -                          |

**0.17-0.80)†**  
SARS-1 preventive training  
(yes vs. no): **OR, 0.07 (95%  
CI, 0.03-0.13)†**

**0.31)†**  
Well-ventilated office  
(yes vs. no): adjusted OR,  
0.32 (95% CI, 0.09-1.15)

**0.45)†**  
Isolating medical staff's  
offices from SARS-1 wards  
(yes vs. no): **OR, 0.57  
(95% CI, 0.38-0.87)†**  
Isolated areas in SARS-1  
wards (yes vs. no): **OR,  
0.25 (95% CI, 0.16-  
0.40)†**  
Working areas didn't  
overlap (yes vs. no): **OR,  
0.24 (95% CI, 0.15-  
0.40)†**

Yen et al, 2011 (76)

Set up standardized negative pressure isolation room in hospital: **OR, 0.17 (95% CI, 0.05-0.63)†**  
 Set up simplified negative pressure isolation room within hospital: **OR, 0.29 (95% CI, 0.09-0.93)†**

Set up fever screen station outside of ED: **adjusted OR, 0.05 (95% CI, 0.004-0.69)**  
 Set up alcohol dispensers at checkpoint for glove-on hand rubbing between zones of risk: **adjusted OR, 0.04 (0.003-0.63)**  
 Body temperature screening in main entrance: **OR, 0.02 (95% CI, 0.00-0.40)†**  
 Separation of fever patients within physical barrier isolated region in ED: OR, 0.26 (95% CI, 0.06-1.08)†  
 Installation of handwashing station in ED: OR, 0.53 (95% CI, 0.14-2.00)†  
 Disinfectant solution available at main entrance (of hospital): **OR, 0.04 (95% CI, 0.004-0.33)†**  
 Set up handwashing facilities around whole hospital: **OR, 0.20 (95% CI, 0.06-0.69)†**

Wearing N95 mask in ED: OR, 0.35 (95% CI, 0.11-1.13) †  
 Wearing N95 mask within zones of risk: **OR, 0.02 (95% CI, 0.001-0.39)†**  
 Mask worn when entering hospital: **OR, 0.02 (95% CI, 0.001-0.40)†**  
 Wearing surgical mask in outpatient department: **OR, 0.09 (95% CI, 0.01-0.88)†**  
 Wearing surgical mask in ward: **OR, 0.09 (95% CI, 0.01-0.88)†**  
 Established crisis response team: **OR, 0.02 (95% CI, 0.001-0.40)†**  
 Exclude visitors from hospital: **OR, 0.11 (95% CI, 0.03-0.41)†**  
 Support from administration for infection control practitioner: **OR, 0.11 (95% CI, 0.03-0.41)†**  
 Support from administration for infectious diseases specialist or physician: **OR, 0.09 (95% CI, 0.02-0.52)†**  
 Support from superintendent or directors for infection control: **OR, 0.08 (95% CI, 0.01-0.42)†**

**MERS-CoV**

|                            |                                                                         |   |   |   |
|----------------------------|-------------------------------------------------------------------------|---|---|---|
| Alraddadi et al, 2016 (19) | Participation in MERS-CoV training: <b>RR, 0.33 (95% CI, 0.12-0.90)</b> | - | - | - |
|----------------------------|-------------------------------------------------------------------------|---|---|---|

AOR = adjusted odds ratio; CoV = coronavirus; ED = emergency department; MERS = Middle East respiratory syndrome; OR = odds ratio; RR = relative risk; SARS = severe acute respiratory syndrome.

\* Values in boldface and italics indicate a statistically significant difference between groups.

† Variable not included in a multivariate model.
